# Supplementary material for: Mechanistic understanding of the Cu(i)-catalyzed domino reaction constructing 1-aryl-1,2,3-triazole from electron-rich aryl bromide, alkyne, and sodium azide: a DFT study
Source: Royal Society of Chemistry journal article supplement (doi:10.1039/d1cy00123j), 2021-01-01
Supplement: d1cy00123j1.pdf [file d1cy00123j1.pdf]

## Supporting Information for:

Mechanistic understanding of the Cu(I)-catalyzed domino reaction constructing 1-aryl-1,2,3-triazole from electron-rich aryl bromide, alkyne, and sodium azide: a DFT study

Hanlin Gan, Liang Peng\*, and Feng Long Gu\*

*Key Laboratory of Theoretical Chemistry of Environment, Ministry of Education, School of Chemistry, South China Normal University, Guangzhou 51006, P. R. China*

Email: pengliang@m.scnu.edu.cn; gu@scnu.edu.cn

|                                                                         |     |
|-------------------------------------------------------------------------|-----|
| Section 1: Figure S1                                                    | S2  |
| Section 2: Figure S2                                                    | S3  |
| Section 3: Table S1                                                     | S3  |
| Section 4: Scheme S1                                                    | S4  |
| Section 5: Cartesian coordinates of intermediates and transition states | S4  |
| Section 6: References                                                   | S47 |

## Section 1:

**Fig. S1** Calculated free energy profile of the  $S_NAr$  reaction of 7-bromoquinoline. The values of free energy are in the units of kcal/mol. Pathway I is the  $S_NAr$  reaction of aryl bromide and  $N_3^-$ . Pathway II is that the aryl bromide first undergoes a nucleophilic substitution with  $I^-$  and subsequently the generated aryl iodide reacts with  $N_3^-$ . At the present theoretical level, they are likely to undergo concerted  $S_NAr$  reactions. The effects of surrounding counter-cation,  $Na^+$ , are disregarded, which has been proven to give reliable mechanism of bimolecular  $S_NAr$  reaction.<sup>1</sup> Since the process of generating aryl iodide is both kinetically and thermodynamically unfavorable ( $\Delta G^\ddagger = 45.0$  kcal/mol,  $\Delta G = +11.5$  kcal/mol), pathway II could be safely ruled out, although the free energy barrier of the substitution reaction between aryl iodide and  $N_3^-$  (34.0 kcal/mol) is lower than that of aryl bromide (36.4 kcal/mol). However, the free energy barrier of the  $S_NAr$  reaction of aryl bromide and  $N_3^-$  corresponds to a very slow reaction rate. Under such a rate, it is impossible to reach a yield of 94% within 3 hours. We conclude that pathway I is thermodynamically favorable but kinetically unfavorable at the experimental conditions.

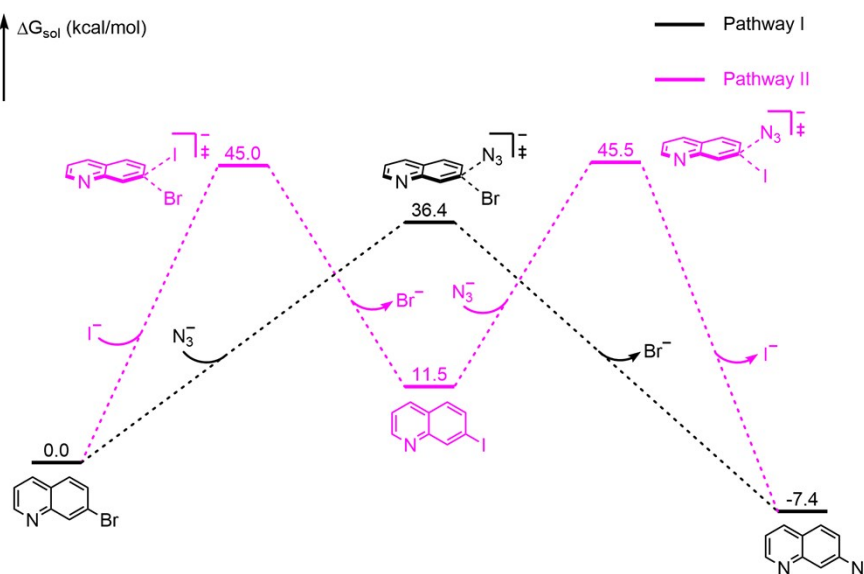

## Section 2:

**Fig. S2** Calculated free energy profile of mononuclear pathway for Cu-catalyzed cycloaddition with anionic copper acetylide and  $\text{N}_3^-$ . The values of free energy are in the units of kcal/mol.

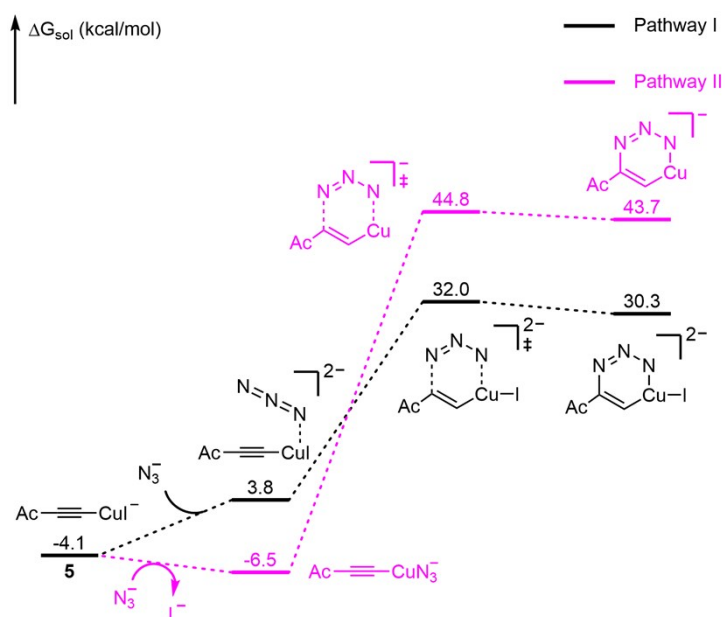

## Section 3

**Table S1** Calculated free energy changes  $\Delta G_{\text{sol}}$  of deprotonation of the ring-protonated structure.

| Reaction | $\Delta G_{\text{sol}}$<br>(kcal/mol) |
|----------|---------------------------------------|
|          | -9.0                                  |
|          | -11.0                                 |
|          | -0.3                                  |

## Section 4

**Scheme S1** Schematic construction of coefficient matrix of combined fragment wavefunction.

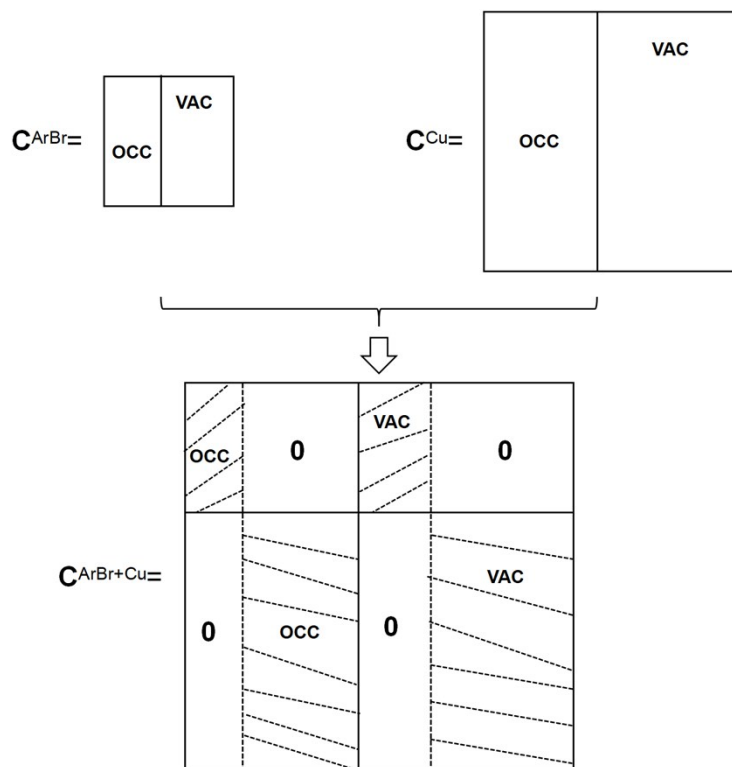

## Section 5

Cartesian coordinates of intermediates and transition states.

Cartesian coordinates of **1**

|    |           |           |           |
|----|-----------|-----------|-----------|
| Cu | 1.094169  | 0.432717  | -0.025393 |
| N  | -0.741296 | 0.981493  | -0.107935 |
| C  | -1.737198 | 0.156858  | -0.357207 |
| C  | -1.048443 | 2.408121  | 0.072214  |
| C  | -1.424058 | -1.309630 | -0.527205 |
| N  | -3.031503 | 0.539311  | -0.431002 |
| H  | -1.064200 | 2.904087  | -0.908306 |
| H  | -0.240420 | 2.860317  | 0.651284  |
| C  | -2.390133 | 2.591236  | 0.769730  |
| C  | -2.007809 | -2.194874 | 0.593719  |
| H  | -1.780314 | -1.658139 | -1.503958 |
| H  | -0.334869 | -1.399564 | -0.536563 |
| C  | -4.108689 | -0.395346 | -0.787871 |
| C  | -3.466855 | 1.889855  | -0.040950 |
| H  | -2.338085 | 2.159025  | 1.775721  |

|   |           |           |           |
|---|-----------|-----------|-----------|
| H | -2.636177 | 3.651889  | 0.871014  |
| C | -3.479227 | -2.577138 | 0.399994  |
| H | -1.869246 | -1.688797 | 1.557917  |
| H | -1.412634 | -3.113699 | 0.635884  |
| C | -4.451570 | -1.396000 | 0.320905  |
| H | -4.978808 | 0.222710  | -1.018436 |
| H | -3.847285 | -0.923035 | -1.710819 |
| H | -3.712247 | 2.463183  | -0.943865 |
| H | -4.385696 | 1.786899  | 0.544373  |
| H | -3.565503 | -3.160472 | -0.527218 |
| H | -3.785605 | -3.242806 | 1.215725  |
| H | -4.489211 | -0.860265 | 1.278160  |
| H | -5.461098 | -1.780518 | 0.132868  |
| I | 3.495547  | -0.310448 | 0.006325  |

| $E_{\text{elec}}$ (a.u.) | $G_{\text{corr}}$ (a.u.) | $E_{\text{g}}$ (a.u.) | $E_{\text{sol}}$ (a.u.) | $\Delta G^*_{\text{solv}}$ (a.u.) |
|--------------------------|--------------------------|-----------------------|-------------------------|-----------------------------------|
| -2399.819591             | 0.202143                 | -670.748232           | -670.787350             | -0.039118                         |

Cartesian coordinates of **2**

|    |           |           |           |
|----|-----------|-----------|-----------|
| Cu | -0.692407 | 0.286152  | 0.299648  |
| N  | 1.024509  | -0.676697 | 0.287653  |
| C  | 2.135710  | -0.270066 | -0.280777 |
| C  | 1.068663  | -1.884700 | 1.120714  |
| C  | 2.090925  | 0.971448  | -1.136523 |
| N  | 3.331737  | -0.882444 | -0.118302 |
| H  | 0.947202  | -2.771563 | 0.483719  |
| H  | 0.216157  | -1.860382 | 1.803515  |
| C  | 2.383934  | -1.963939 | 1.884781  |
| C  | 2.868719  | 2.156203  | -0.526751 |
| H  | 2.478028  | 0.747577  | -2.137468 |
| H  | 1.040442  | 1.238845  | -1.260093 |
| C  | 4.545661  | -0.432994 | -0.814405 |
| C  | 3.532854  | -1.935889 | 0.890154  |
| H  | 2.457282  | -1.108651 | 2.566707  |
| H  | 2.436471  | -2.877521 | 2.483460  |
| C  | 4.375890  | 2.127872  | -0.803991 |
| H  | 2.682168  | 2.189192  | 0.554219  |
| H  | 2.453970  | 3.080871  | -0.943163 |
| C  | 5.109292  | 0.888782  | -0.279861 |
| H  | 5.279270  | -1.231662 | -0.686175 |

|   |           |           |           |
|---|-----------|-----------|-----------|
| H | 4.349760  | -0.359692 | -1.888924 |
| H | 3.632240  | -2.903611 | 0.382585  |
| H | 4.479194  | -1.733104 | 1.401256  |
| H | 4.528873  | 2.188334  | -1.890386 |
| H | 4.835510  | 3.026240  | -0.374888 |
| H | 5.085746  | 0.861043  | 0.817284  |
| H | 6.164181  | 0.952878  | -0.572259 |
| C | -1.668016 | 1.964879  | 0.896449  |
| C | -0.462321 | 2.069957  | 1.176713  |
| H | 0.472103  | 2.462474  | 1.533012  |
| I | -2.603186 | -1.381264 | -0.670961 |
| C | -3.107854 | 2.124119  | 0.712516  |
| O | -3.883400 | 1.776573  | 1.595995  |
| C | -3.541996 | 2.709012  | -0.601003 |
| H | -3.106994 | 3.707727  | -0.722003 |
| H | -3.166905 | 2.086787  | -1.420379 |
| H | -4.631302 | 2.766093  | -0.640416 |

| $E_{\text{elec}}$ (a.u.) | $G_{\text{corr}}$ (a.u.) | $E_{\text{g}}$ (a.u.) | $E_{\text{sol}}$ (a.u.) | $\Delta G^*_{\text{solv}}$ (a.u.) |
|--------------------------|--------------------------|-----------------------|-------------------------|-----------------------------------|
| -2629.719869             | 0.256384                 | -900.617709           | -900.6691171            | -0.051408                         |

Cartesian coordinates of **2-TS**

|    |           |           |           |
|----|-----------|-----------|-----------|
| Cu | -1.474761 | 0.162456  | 0.356272  |
| N  | 1.572775  | -0.869113 | 1.118154  |
| C  | 2.322651  | -0.639895 | 0.078176  |
| C  | 2.251834  | -1.250177 | 2.355794  |
| C  | 1.633407  | -0.215487 | -1.199654 |
| N  | 3.688494  | -0.711855 | 0.055331  |
| H  | 2.410522  | -2.339730 | 2.375531  |
| H  | 1.592177  | -1.016811 | 3.199030  |
| C  | 3.595639  | -0.540856 | 2.510208  |
| C  | 1.952919  | 1.230943  | -1.629526 |
| H  | 1.879286  | -0.905604 | -2.016401 |
| H  | 0.562394  | -0.315269 | -1.013733 |
| C  | 4.472786  | -0.507808 | -1.165758 |
| C  | 4.460107  | -0.852880 | 1.297245  |
| H  | 3.426297  | 0.540898  | 2.575893  |
| H  | 4.112514  | -0.852932 | 3.422973  |
| C  | 3.266322  | 1.388112  | -2.403543 |
| H  | 1.958741  | 1.877188  | -0.742217 |

|   |           |           |           |
|---|-----------|-----------|-----------|
| H | 1.131431  | 1.584385  | -2.263876 |
| C | 4.522809  | 0.948655  | -1.644781 |
| H | 5.483102  | -0.858870 | -0.941720 |
| H | 4.092383  | -1.153505 | -1.965146 |
| H | 4.864900  | -1.872113 | 1.364457  |
| H | 5.313378  | -0.167382 | 1.249034  |
| H | 3.195694  | 0.798729  | -3.328536 |
| H | 3.378466  | 2.435021  | -2.711130 |
| H | 4.695407  | 1.597475  | -0.776042 |
| H | 5.391652  | 1.064741  | -2.304345 |
| C | -1.355640 | 2.186562  | 0.725851  |
| C | -0.316641 | 1.652004  | 1.122667  |
| H | 0.626741  | 1.265680  | 1.468760  |
| I | -2.787138 | -1.857034 | -0.453565 |
| C | -2.430583 | 3.123889  | 0.382908  |
| O | -3.489830 | 2.721562  | -0.077383 |
| C | -2.118283 | 4.570329  | 0.637845  |
| H | -1.875782 | 4.714197  | 1.696741  |
| H | -1.233734 | 4.861679  | 0.060133  |
| H | -2.973389 | 5.187730  | 0.357731  |

| $E_{\text{elec}}$ (a.u.) | $G_{\text{corr}}$ (a.u.) | $E_{\text{g}}$ (a.u.) | $E_{\text{sol}}$ (a.u.) | $\Delta G^*_{\text{solv}}$ (a.u.) |
|--------------------------|--------------------------|-----------------------|-------------------------|-----------------------------------|
| -2629.684022             | 0.252078                 | -900.594015           | -900.6470381            | -0.053023                         |

Cartesian coordinates of **3**

|    |           |           |           |
|----|-----------|-----------|-----------|
| Cu | -2.094055 | 0.291205  | 0.044208  |
| N  | 1.777616  | -0.704290 | 0.469290  |
| C  | 2.882578  | -0.571263 | -0.209988 |
| C  | 1.764344  | -1.627250 | 1.600363  |
| C  | 2.883086  | 0.435501  | -1.337934 |
| N  | 4.037884  | -1.239962 | 0.050664  |
| H  | 1.493739  | -2.636731 | 1.257121  |
| H  | 0.974768  | -1.307666 | 2.291021  |
| C  | 3.120809  | -1.668297 | 2.299764  |
| C  | 3.821364  | 1.634981  | -1.091135 |
| H  | 3.149010  | -0.054204 | -2.282717 |
| H  | 1.854234  | 0.786315  | -1.443383 |
| C  | 5.233791  | -1.109829 | -0.788574 |
| C  | 4.191105  | -2.032341 | 1.279912  |
| H  | 3.335899  | -0.681088 | 2.725413  |

|   |           |           |           |
|---|-----------|-----------|-----------|
| H | 3.128228  | -2.395398 | 3.117155  |
| C | 5.293073  | 1.372625  | -1.429982 |
| H | 3.722999  | 1.955973  | -0.045914 |
| H | 3.468927  | 2.470406  | -1.706707 |
| C | 5.952861  | 0.236412  | -0.641833 |
| H | 5.901425  | -1.923520 | -0.496073 |
| H | 4.970777  | -1.286197 | -1.837324 |
| H | 4.142662  | -3.101356 | 1.033320  |
| H | 5.188616  | -1.835651 | 1.686095  |
| H | 5.364804  | 1.138596  | -2.501385 |
| H | 5.864270  | 2.296164  | -1.275801 |
| H | 6.010180  | 0.488686  | 0.425031  |
| H | 6.984279  | 0.115108  | -0.994713 |
| C | -1.131176 | 2.079487  | 0.492240  |
| C | -0.304318 | 1.156226  | 0.474163  |
| H | 0.574063  | 0.408333  | 0.458515  |
| I | -3.854228 | -1.466302 | -0.461196 |
| C | -1.854028 | 3.345485  | 0.588680  |
| O | -3.067268 | 3.392048  | 0.421229  |
| C | -1.008645 | 4.548234  | 0.899812  |
| H | -0.489549 | 4.397634  | 1.853046  |
| H | -0.240143 | 4.667886  | 0.127812  |
| H | -1.636943 | 5.439322  | 0.948451  |

| $E_{\text{elec}}$ (a.u.) | $G_{\text{corr}}$ (a.u.) | $E_{\text{g}}$ (a.u.) | $E_{\text{sol}}$ (a.u.) | $\Delta G^*_{\text{solv}}$ (a.u.) |
|--------------------------|--------------------------|-----------------------|-------------------------|-----------------------------------|
| -2629.689705             | 0.249978                 | -900.597927           | -900.645299             | -0.047372                         |

Cartesian coordinates of **3-TS**

|    |           |           |           |
|----|-----------|-----------|-----------|
| Cu | -2.056425 | 0.295110  | 0.042586  |
| N  | 1.720216  | -0.641928 | 0.501914  |
| C  | 2.822967  | -0.536553 | -0.192478 |
| C  | 1.663492  | -1.571910 | 1.625014  |
| C  | 2.847156  | 0.486347  | -1.303715 |
| N  | 3.943645  | -1.254925 | 0.050236  |
| H  | 1.329638  | -2.559246 | 1.276384  |
| H  | 0.903380  | -1.206842 | 2.325628  |
| C  | 3.026824  | -1.692519 | 2.300039  |
| C  | 3.843048  | 1.638114  | -1.055311 |
| H  | 3.076352  | -0.004654 | -2.257172 |
| H  | 1.834441  | 0.885450  | -1.390695 |



|   |           |           |           |
|---|-----------|-----------|-----------|
| C | 5.134817  | -1.171545 | -0.804365 |
| C | 4.062833  | -2.089133 | 1.256887  |
| H | 3.297698  | -0.726799 | 2.742042  |
| H | 3.008877  | -2.436943 | 3.101058  |
| C | 5.295660  | 1.312475  | -1.419917 |
| H | 3.774369  | 1.949652  | -0.005100 |
| H | 3.519125  | 2.495568  | -1.655662 |
| C | 5.914393  | 0.139265  | -0.653131 |
| H | 5.766738  | -2.017890 | -0.527059 |
| H | 4.848276  | -1.325241 | -1.850168 |
| H | 3.950100  | -3.145124 | 0.979452  |
| H | 5.074223  | -1.959364 | 1.653974  |
| H | 5.340446  | 1.087039  | -2.494512 |
| H | 5.910534  | 2.207181  | -1.264787 |
| H | 5.998468  | 0.376481  | 0.415274  |
| H | 6.933727  | -0.025370 | -1.022597 |
| C | -1.085683 | 2.093791  | 0.484076  |
| C | -0.273099 | 1.150926  | 0.471576  |
| H | 0.670167  | 0.326697  | 0.454805  |
| I | -3.820076 | -1.460673 | -0.463771 |
| C | -1.784148 | 3.369117  | 0.570242  |
| O | -2.997089 | 3.442382  | 0.395948  |
| C | -0.920903 | 4.561347  | 0.880868  |
| H | -0.410104 | 4.408631  | 1.838184  |
| H | -0.145786 | 4.665834  | 0.113356  |
| H | -1.534771 | 5.462995  | 0.921164  |

| $E_{\text{elec}}$ (a.u.) | $G_{\text{corr}}$ (a.u.) | $E_{\text{g}}$ (a.u.) | $E_{\text{sol}}$ (a.u.) | $\Delta G^*_{\text{solv}}$ (a.u.) |
|--------------------------|--------------------------|-----------------------|-------------------------|-----------------------------------|
| -2629.686613             | 0.248869                 | -900.595203           | -900.644014             | -0.048811                         |

Cartesian coordinates of **4**

|    |           |           |           |
|----|-----------|-----------|-----------|
| Cu | -2.043457 | 0.911424  | -0.138403 |
| N  | 0.927174  | -0.466454 | 0.502930  |
| C  | 2.013689  | -0.843898 | -0.155533 |
| C  | 0.173425  | -1.340076 | 1.401470  |
| C  | 2.694597  | 0.177193  | -1.022290 |
| N  | 2.508662  | -2.069199 | -0.026162 |
| H  | -0.616633 | -1.849730 | 0.839910  |
| H  | -0.301216 | -0.710471 | 2.156395  |
| C  | 1.139248  | -2.340204 | 2.020010  |

|   |           |           |           |
|---|-----------|-----------|-----------|
| C | 4.110635  | 0.541044  | -0.527400 |
| H | 2.740005  | -0.201353 | -2.049689 |
| H | 2.064390  | 1.068707  | -1.037459 |
| C | 3.673146  | -2.525606 | -0.809647 |
| C | 1.926779  | -3.041294 | 0.921805  |
| H | 1.826953  | -1.817815 | 2.693192  |
| H | 0.591671  | -3.084516 | 2.602622  |
| C | 5.197098  | -0.468232 | -0.911929 |
| H | 4.085859  | 0.681898  | 0.559899  |
| H | 4.366344  | 1.512442  | -0.961986 |
| C | 4.991661  | -1.885709 | -0.368914 |
| H | 3.712318  | -3.607674 | -0.679225 |
| H | 3.486515  | -2.338109 | -1.871531 |
| H | 1.291285  | -3.735866 | 0.360966  |
| H | 2.754868  | -3.611008 | 1.349222  |
| H | 5.252577  | -0.519618 | -2.007731 |
| H | 6.166481  | -0.089746 | -0.567689 |
| H | 5.039592  | -1.894004 | 0.727157  |
| H | 5.807346  | -2.523719 | -0.727578 |
| C | 0.107839  | 3.098430  | 0.196667  |
| C | -0.751532 | 2.221775  | 0.061214  |
| H | 0.584094  | 0.482206  | 0.359262  |
| I | -3.812564 | -0.906172 | -0.293104 |
| C | 1.098539  | 4.127422  | 0.360168  |
| O | 0.790215  | 5.322652  | 0.384155  |
| C | 2.532234  | 3.671339  | 0.483223  |
| H | 2.619847  | 2.857283  | 1.209144  |
| H | 2.868097  | 3.282268  | -0.484739 |
| H | 3.169000  | 4.509871  | 0.774361  |

| $E_{\text{elec}}$ (a.u.) | $G_{\text{corr}}$ (a.u.) | $E_{\text{g}}$ (a.u.) | $E_{\text{sol}}$ (a.u.) | $\Delta G^*_{\text{solv}}$ (a.u.) |
|--------------------------|--------------------------|-----------------------|-------------------------|-----------------------------------|
| -2629.705344             | 0.256549                 | -900.607520           | -900.674003             | -0.066484                         |

Cartesian coordinates of **5**

|    |           |           |           |
|----|-----------|-----------|-----------|
| Cu | -0.088901 | -0.172292 | -0.000391 |
| C  | 2.992460  | -0.175232 | 0.000178  |
| C  | 1.758522  | -0.211646 | 0.000034  |
| I  | -2.625907 | 0.076941  | 0.000200  |
| C  | 4.426603  | -0.097322 | -0.000011 |
| O  | 5.137953  | -1.107625 | -0.000033 |

|   |          |          |           |
|---|----------|----------|-----------|
| C | 5.020070 | 1.292701 | -0.000024 |
| H | 4.675197 | 1.845702 | -0.881022 |
| H | 4.675413 | 1.845619 | 0.881114  |
| H | 6.111044 | 1.237234 | -0.000156 |

| $E_{\text{elec}}$ (a.u.) | $G_{\text{corr}}$ (a.u.) | $E_{\text{g}}$ (a.u.) | $E_{\text{sol}}$ (a.u.) | $\Delta G^*_{\text{solv}}$ (a.u.) |
|--------------------------|--------------------------|-----------------------|-------------------------|-----------------------------------|
| -2167.330117             | 0.014296                 | -438.206059           | -438.282578             | -0.076519                         |

Cartesian coordinates of **6**

|    |           |           |           |
|----|-----------|-----------|-----------|
| C  | -0.620710 | 1.527219  | 0.000185  |
| C  | 0.721245  | 1.834136  | 0.000354  |
| C  | 1.703621  | 0.811220  | 0.000289  |
| C  | 1.288146  | -0.556497 | 0.000044  |
| C  | -0.099560 | -0.863054 | -0.000130 |
| C  | -1.003436 | 0.168049  | -0.000059 |
| H  | 3.443588  | 2.105890  | 0.000663  |
| H  | -1.368149 | 2.311829  | 0.000238  |
| H  | 1.040349  | 2.872266  | 0.000545  |
| C  | 3.096454  | 1.076643  | 0.000456  |
| H  | -0.399625 | -1.904210 | -0.000327 |
| C  | 3.463415  | -1.297508 | 0.000099  |
| C  | 3.978284  | 0.022092  | 0.000360  |
| H  | 4.155514  | -2.138424 | 0.000063  |
| H  | 5.051382  | 0.179586  | 0.000490  |
| N  | 2.176390  | -1.595015 | -0.000033 |
| Br | -2.923501 | -0.245590 | -0.000315 |

| $E_{\text{elec}}$ (a.u.) | $G_{\text{corr}}$ (a.u.) | $E_{\text{g}}$ (a.u.) | $E_{\text{sol}}$ (a.u.) | $\Delta G^*_{\text{solv}}$ (a.u.) |
|--------------------------|--------------------------|-----------------------|-------------------------|-----------------------------------|
| -2974.914654             | 0.088279                 | -414.480815           | -414.495718             | -0.014903                         |

Cartesian coordinates of **7**

|   |           |           |           |
|---|-----------|-----------|-----------|
| C | 0.810894  | 1.851661  | 0.000022  |
| C | -0.558345 | 1.950132  | 0.000140  |
| C | -1.370242 | 0.785135  | -0.000012 |
| C | -0.741055 | -0.500728 | -0.000110 |
| C | 0.672482  | -0.583020 | 0.000025  |

|   |           |           |           |
|---|-----------|-----------|-----------|
| C | 1.428518  | 0.573282  | -0.000154 |
| H | -3.290160 | 1.790407  | -0.000277 |
| H | 1.440345  | 2.735183  | 0.000376  |
| H | -1.037348 | 2.924835  | 0.000326  |
| C | -2.785515 | 0.828236  | -0.000127 |
| H | 1.132309  | -1.566193 | 0.000274  |
| C | -2.777079 | -1.572766 | 0.000177  |
| C | -3.492925 | -0.351596 | -0.000133 |
| H | -3.328236 | -2.512008 | 0.000050  |
| H | -4.577704 | -0.363476 | -0.000265 |
| N | -1.458828 | -1.665517 | 0.000140  |
| N | 2.848026  | 0.593159  | 0.000054  |
| N | 3.441897  | -0.492242 | -0.000045 |
| N | 4.103246  | -1.419794 | -0.000070 |

| $E_{\text{elec}}$ (a.u.) | $G_{\text{corr}}$ (a.u.) | $E_{\text{g}}$ (a.u.) | $E_{\text{sol}}$ (a.u.) | $\Delta G^*_{\text{solv}}$ (a.u.) |
|--------------------------|--------------------------|-----------------------|-------------------------|-----------------------------------|
| -565.2915862             | 0.100455                 | -565.280200           | -565.289718             | -0.009517                         |

Cartesian coordinates of **8**

|    |           |           |           |
|----|-----------|-----------|-----------|
| Cu | -0.179386 | -0.510492 | -0.205164 |
| N  | -2.089943 | -1.085781 | -0.357066 |
| C  | -3.077616 | -0.65514  | 0.390188  |
| C  | -2.406221 | -2.006349 | -1.454821 |
| C  | -2.761624 | 0.304388  | 1.511017  |
| N  | -4.37845  | -0.987191 | 0.19352   |
| H  | -2.433676 | -3.037134 | -1.074138 |
| H  | -1.595615 | -1.956606 | -2.186334 |
| C  | -3.74337  | -1.649785 | -2.093094 |
| C  | -3.351254 | 1.712426  | 1.283634  |
| H  | -3.11922  | -0.101198 | 2.464988  |
| H  | -1.674369 | 0.365542  | 1.580613  |
| C  | -5.448331 | -0.550547 | 1.100182  |
| C  | -4.823265 | -1.683382 | -1.023572 |
| H  | -3.67846  | -0.645208 | -2.527578 |
| H  | -3.996793 | -2.347978 | -2.895942 |
| C  | -4.814079 | 1.85868   | 1.714545  |
| H  | -3.241394 | 1.978932  | 0.2258    |
| H  | -2.743111 | 2.43016   | 1.843795  |
| C  | -5.79584  | 0.93805   | 0.982137  |
| H  | -6.321214 | -1.158188 | 0.851325  |

|    |           |           |           |
|----|-----------|-----------|-----------|
| H  | -5.181184 | -0.798537 | 2.132702  |
| H  | -5.087537 | -2.718426 | -0.771132 |
| H  | -5.733098 | -1.189163 | -1.379312 |
| H  | -4.882025 | 1.654336  | 2.792208  |
| H  | -5.125971 | 2.900816  | 1.575286  |
| H  | -5.849459 | 1.20156   | -0.082228 |
| H  | -6.800082 | 1.087903  | 1.39667   |
| C  | -0.354795 | 2.496285  | -0.618264 |
| C  | 0.192065  | 1.397809  | -0.425311 |
| I  | 1.382691  | -2.732399 | 0.132236  |
| C  | -1.043237 | 3.732489  | -0.81347  |
| O  | -1.432489 | 4.419207  | 0.143235  |
| C  | -1.288489 | 4.156023  | -2.243632 |
| H  | -0.344066 | 4.199863  | -2.796756 |
| H  | -1.921894 | 3.414823  | -2.745137 |
| H  | -1.778946 | 5.131899  | -2.26535  |
| Cu | 1.933415  | 0.652593  | -0.066333 |
| I  | 4.460257  | 0.927062  | 0.280512  |

| $E_{\text{elec}}$ (a.u.) | $G_{\text{corr}}$ (a.u.) | $E_{\text{g}}$ (a.u.) | $E_{\text{sol}}$ (a.u.) | $\Delta G^*_{\text{solv}}$ (a.u.) |
|--------------------------|--------------------------|-----------------------|-------------------------|-----------------------------------|
| -4567.169084             | 0.235519                 | -1108.966791          | -1109.083649            | -0.116858                         |

Cartesian coordinates of **9**

|    |           |           |           |
|----|-----------|-----------|-----------|
| C  | -2.583182 | 2.136132  | 0.501683  |
| C  | -1.774864 | 1.198096  | 0.403862  |
| N  | -5.129828 | 1.179089  | -0.991653 |
| N  | -4.447479 | 0.237670  | -1.092320 |
| N  | -3.747175 | -0.733242 | -1.196219 |
| Cu | -1.957752 | -0.663533 | -0.306334 |
| Cu | -0.014077 | 0.548392  | 0.609917  |
| I  | -0.702859 | -3.055365 | -0.227833 |
| N  | 1.849399  | 0.144527  | 0.890400  |
| C  | 2.785176  | 0.364792  | -0.008844 |
| C  | 2.236996  | -0.490193 | 2.156942  |
| C  | 2.379122  | 0.999741  | -1.316456 |
| N  | 4.093286  | 0.085105  | 0.180713  |
| H  | 2.229533  | -1.581725 | 2.031518  |
| H  | 1.481120  | -0.245996 | 2.906913  |
| C  | 3.617845  | -0.022644 | 2.597556  |
| C  | 2.947094  | 2.419883  | -1.514022 |

|   |           |           |           |
|---|-----------|-----------|-----------|
| H | 2.680672  | 0.356441  | -2.151592 |
| H | 1.286949  | 1.034990  | -1.325534 |
| C | 5.101130  | 0.288313  | -0.870566 |
| C | 4.617204  | -0.326482 | 1.493605  |
| H | 3.591077  | 1.056008  | 2.791173  |
| H | 3.925258  | -0.522884 | 3.520141  |
| C | 4.386701  | 2.457662  | -2.037445 |
| H | 2.870337  | 2.971077  | -0.567897 |
| H | 2.302242  | 2.940236  | -2.230810 |
| C | 5.419921  | 1.762071  | -1.145654 |
| H | 5.999306  | -0.231347 | -0.530957 |
| H | 4.780377  | -0.211857 | -1.790045 |
| H | 4.852979  | -1.397706 | 1.464847  |
| H | 5.553804  | 0.213568  | 1.662670  |
| H | 4.406901  | 1.981892  | -3.027645 |
| H | 4.685253  | 3.502025  | -2.188035 |
| H | 5.517879  | 2.285174  | -0.185740 |
| H | 6.399837  | 1.812102  | -1.635221 |
| C | -3.547664 | 3.189741  | 0.592418  |
| O | -3.504888 | 4.178644  | -0.153976 |
| C | -4.577783 | 3.076132  | 1.694670  |
| H | -4.929464 | 2.048293  | 1.807934  |
| H | -4.116118 | 3.379388  | 2.643027  |
| H | -5.417846 | 3.743088  | 1.485334  |

| $E_{\text{elec}}$ (a.u.) | $G_{\text{corr}}$ (a.u.) | $E_{\text{g}}$ (a.u.) | $E_{\text{sol}}$ (a.u.) | $\Delta G^*_{\text{solv}}$ (a.u.) |
|--------------------------|--------------------------|-----------------------|-------------------------|-----------------------------------|
| -4433.733028             | 0.247187                 | -1261.664448          | -1261.794405            | -0.129957                         |

Cartesian coordinates of **9-TS**

|    |           |           |           |
|----|-----------|-----------|-----------|
| C  | 3.116340  | -1.746666 | -0.283935 |
| C  | 2.090121  | -1.019117 | -0.015737 |
| N  | 4.744865  | -0.874082 | -0.686909 |
| N  | 4.511225  | 0.300361  | -0.620558 |
| N  | 3.875593  | 1.304060  | -0.453830 |
| Cu | 1.923762  | 0.895993  | 0.052655  |
| Cu | 0.257956  | -1.028770 | 0.402746  |
| I  | 0.445491  | 3.094980  | 0.389635  |
| N  | -1.617352 | -1.091531 | 0.837804  |
| C  | -2.563745 | -0.494803 | 0.144793  |
| C  | -2.002153 | -1.807187 | 2.062572  |

|   |           |           |           |
|---|-----------|-----------|-----------|
| C | -2.173721 | 0.230811  | -1.119682 |
| N | -3.874027 | -0.526930 | 0.477648  |
| H | -2.029952 | -1.101250 | 2.904563  |
| H | -1.226655 | -2.544301 | 2.283804  |
| C | -3.361553 | -2.473648 | 1.898107  |
| C | -2.737076 | -0.421704 | -2.399068 |
| H | -2.490777 | 1.278409  | -1.062234 |
| H | -1.082318 | 0.237652  | -1.158685 |
| C | -4.895011 | 0.213953  | -0.276557 |
| C | -4.386816 | -1.412475 | 1.535572  |
| H | -3.302774 | -3.225263 | 1.102169  |
| H | -3.664197 | -2.980511 | 2.818640  |
| C | -4.182775 | -0.032226 | -2.726169 |
| H | -2.645876 | -1.512654 | -2.316447 |
| H | -2.098000 | -0.118558 | -3.235864 |
| C | -5.210800 | -0.391156 | -1.648676 |
| H | -5.790264 | 0.213539  | 0.348817  |
| H | -4.587939 | 1.259441  | -0.380945 |
| H | -4.650425 | -0.808763 | 2.413158  |
| H | -5.306711 | -1.875205 | 1.164940  |
| H | -4.218768 | 1.053376  | -2.892155 |
| H | -4.474288 | -0.501494 | -3.673470 |
| H | -5.294869 | -1.480340 | -1.541012 |
| H | -6.196018 | -0.026942 | -1.963653 |
| C | 3.433415  | -3.169675 | -0.389603 |
| O | 4.540937  | -3.622561 | -0.680137 |
| C | 2.276031  | -4.114915 | -0.111831 |
| H | 1.889393  | -3.951708 | 0.899152  |
| H | 1.453977  | -3.919377 | -0.807757 |
| H | 2.612466  | -5.149283 | -0.216998 |

| $E_{\text{elec}}$ (a.u.) | $G_{\text{corr}}$ (a.u.) | $E_{\text{g}}$ (a.u.) | $E_{\text{sol}}$ (a.u.) | $\Delta G^*_{\text{solv}}$ (a.u.) |
|--------------------------|--------------------------|-----------------------|-------------------------|-----------------------------------|
| -4433.711802             | 0.252152                 | -1261.637212          | -1261.760988            | -0.123776                         |

Cartesian coordinates of **10**

|   |           |           |          |
|---|-----------|-----------|----------|
| C | -3.284034 | -1.592482 | 0.317270 |
| C | -2.153132 | -0.925520 | 0.060626 |
| N | -4.589555 | -1.007288 | 0.567414 |
| N | -4.614224 | 0.270562  | 0.529728 |
| N | -3.775001 | 1.153721  | 0.328232 |

|    |           |           |           |
|----|-----------|-----------|-----------|
| Cu | -1.918850 | 0.922068  | -0.021092 |
| Cu | -0.329560 | -1.070541 | -0.332253 |
| I  | -0.391894 | 3.109210  | -0.346327 |
| N  | 1.536931  | -1.124690 | -0.805187 |
| C  | 2.498895  | -0.529702 | -0.132388 |
| C  | 1.880594  | -1.781452 | -2.074350 |
| C  | 2.150106  | 0.136115  | 1.176616  |
| N  | 3.792773  | -0.513645 | -0.524916 |
| H  | 1.844323  | -1.043897 | -2.888442 |
| H  | 1.116795  | -2.533823 | -2.285380 |
| C  | 3.265064  | -2.411429 | -2.004571 |
| C  | 2.787121  | -0.552403 | 2.401687  |
| H  | 2.440067  | 1.192521  | 1.147451  |
| H  | 1.061710  | 0.113935  | 1.264977  |
| C  | 4.830030  | 0.222033  | 0.212340  |
| C  | 4.276051  | -1.335483 | -1.646080 |
| H  | 3.267758  | -3.197163 | -1.240127 |
| H  | 3.536123  | -2.869272 | -2.959968 |
| C  | 4.236892  | -0.139933 | 2.678931  |
| H  | 2.718027  | -1.641081 | 2.278470  |
| H  | 2.180563  | -0.299199 | 3.278310  |
| C  | 5.222360  | -0.429740 | 1.542541  |
| H  | 5.695199  | 0.268695  | -0.452298 |
| H  | 4.504562  | 1.254736  | 0.373224  |
| H  | 4.476687  | -0.685735 | -2.507303 |
| H  | 5.226897  | -1.785177 | -1.343468 |
| H  | 4.255496  | 0.938745  | 2.887495  |
| H  | 4.582350  | -0.639275 | 3.592102  |
| H  | 5.326444  | -1.511262 | 1.386248  |
| H  | 6.212262  | -0.053902 | 1.827710  |
| C  | -3.353140 | -3.083973 | 0.386846  |
| O  | -4.396947 | -3.676460 | 0.659852  |
| C  | -2.093317 | -3.878819 | 0.110147  |
| H  | -1.718035 | -3.665072 | -0.895490 |
| H  | -1.301754 | -3.603051 | 0.813521  |
| H  | -2.313021 | -4.945318 | 0.201920  |

| $E_{\text{elec}}$ (a.u.) | $G_{\text{corr}}$ (a.u.) | $E_{\text{g}}$ (a.u.) | $E_{\text{sol}}$ (a.u.) | $\Delta G_{\text{sol}}^*$ (a.u.) |
|--------------------------|--------------------------|-----------------------|-------------------------|----------------------------------|
| -4433.718535             | 0.254538                 | -1261.630104          | -1261.756898            | -0.126793                        |



Cartesian coordinates of **10-TS**

|    |           |           |           |
|----|-----------|-----------|-----------|
| C  | 2.769828  | 2.137082  | 0.495704  |
| C  | 1.848120  | 1.171787  | 0.307064  |
| N  | 3.985717  | 1.946962  | 1.210151  |
| N  | 4.054360  | 0.744347  | 1.686495  |
| N  | 3.227629  | -0.181746 | 1.546928  |
| Cu | 1.946820  | -0.716460 | 0.205127  |
| Cu | 0.075294  | 0.966714  | -0.285382 |
| I  | 1.378710  | -3.088570 | -0.751421 |
| N  | -1.763538 | 0.847347  | -0.846812 |
| C  | -2.674305 | 0.121683  | -0.232136 |
| C  | -2.218006 | 1.785240  | -1.883109 |
| C  | -2.214701 | -0.857372 | 0.820027  |
| N  | -4.001488 | 0.225981  | -0.466561 |
| H  | -2.331868 | 1.248317  | -2.835404 |
| H  | -1.441429 | 2.539573  | -2.027013 |
| C  | -3.541766 | 2.425585  | -1.487207 |
| C  | -2.653047 | -0.467889 | 2.246472  |
| H  | -2.579402 | -1.862565 | 0.577691  |
| H  | -1.124632 | -0.897627 | 0.763949  |
| C  | -4.987277 | -0.628135 | 0.211686  |
| C  | -4.568174 | 1.327394  | -1.263780 |
| H  | -3.401662 | 3.003041  | -0.565931 |
| H  | -3.896860 | 3.109378  | -2.263256 |
| C  | -4.087007 | -0.877028 | 2.601399  |
| H  | -2.521128 | 0.614083  | 2.377937  |
| H  | -1.968103 | -0.952535 | 2.951134  |
| C  | -5.175071 | -0.290751 | 1.695513  |
| H  | -5.927000 | -0.488951 | -0.326862 |
| H  | -4.709909 | -1.679799 | 0.089660  |
| H  | -4.925703 | 0.927244  | -2.220662 |
| H  | -5.436976 | 1.716380  | -0.723746 |
| H  | -4.154113 | -1.972901 | 2.558324  |
| H  | -4.292836 | -0.593633 | 3.640557  |
| H  | -5.222289 | 0.800695  | 1.803682  |
| H  | -6.148577 | -0.682363 | 2.013835  |
| C  | 2.617194  | 3.524737  | -0.029350 |
| O  | 3.530340  | 4.347933  | 0.051019  |
| C  | 1.319034  | 3.915677  | -0.704901 |
| H  | 1.220344  | 3.382249  | -1.656377 |
| H  | 0.455588  | 3.643004  | -0.091690 |
| H  | 1.323243  | 4.991469  | -0.896984 |

| $E_{\text{elec}}$ (a.u.) | $G_{\text{corr}}$ (a.u.) | $E_{\text{g}}$ (a.u.) | $E_{\text{sol}}$ (a.u.) | $\Delta G^*_{\text{solv}}$ (a.u.) |
|--------------------------|--------------------------|-----------------------|-------------------------|-----------------------------------|
| -4433.710524             | 0.253725                 | -1261.633573          | -1261.763388            | -0.129815                         |

Cartesian coordinates of **11**

|    |           |           |           |
|----|-----------|-----------|-----------|
| C  | -3.869556 | -0.718934 | 0.249331  |
| C  | -2.499949 | -0.414341 | 0.074885  |
| N  | -4.573584 | 0.442114  | 0.472090  |
| N  | -3.726844 | 1.435105  | 0.444556  |
| N  | -2.463291 | 0.943644  | 0.206075  |
| Cu | -0.966148 | 2.082197  | 0.008863  |
| Cu | -0.926911 | -1.412831 | -0.229151 |
| I  | 0.949031  | 3.686990  | -0.309756 |
| N  | 0.724579  | -2.360199 | -0.491292 |
| C  | 1.903490  | -1.787388 | -0.364816 |
| C  | 0.684954  | -3.806180 | -0.749596 |
| C  | 1.949125  | -0.303011 | -0.097762 |
| N  | 3.077259  | -2.456117 | -0.423237 |
| H  | 0.783799  | -3.987262 | -1.829244 |
| H  | -0.295771 | -4.180330 | -0.447200 |
| C  | 1.800734  | -4.521791 | 0.000766  |
| C  | 2.478625  | 0.047963  | 1.306666  |
| H  | 2.553763  | 0.198960  | -0.862034 |
| H  | 0.929510  | 0.076287  | -0.208534 |
| C  | 4.374959  | -1.771478 | -0.332049 |
| C  | 3.135011  | -3.927070 | -0.418655 |
| H  | 1.653749  | -4.389491 | 1.079027  |
| H  | 1.792201  | -5.594566 | -0.211366 |
| C  | 4.006713  | 0.070336  | 1.416533  |
| H  | 2.052921  | -0.653748 | 2.035822  |
| H  | 2.095107  | 1.040681  | 1.565684  |
| C  | 4.702106  | -1.251260 | 1.072589  |
| H  | 5.123505  | -2.502504 | -0.644878 |
| H  | 4.412758  | -0.955197 | -1.060381 |
| H  | 3.421438  | -4.277788 | -1.418203 |
| H  | 3.926083  | -4.227776 | 0.275294  |
| H  | 4.389414  | 0.849462  | 0.742653  |
| H  | 4.289041  | 0.371853  | 2.432403  |
| H  | 4.440485  | -2.027447 | 1.803421  |
| H  | 5.787263  | -1.107627 | 1.138079  |
| C  | -4.542511 | -2.009392 | 0.217036  |
| O  | -5.767515 | -2.122314 | 0.372520  |

|   |           |           |           |
|---|-----------|-----------|-----------|
| C | -3.696714 | -3.248263 | -0.012130 |
| H | -3.130205 | -3.167901 | -0.945276 |
| H | -2.967871 | -3.369724 | 0.796297  |
| H | -4.345730 | -4.126420 | -0.050448 |

| $E_{\text{elec}}$ (a.u.) | $G_{\text{corr}}$ (a.u.) | $E_{\text{g}}$ (a.u.) | $E_{\text{sol}}$ (a.u.) | $\Delta G^*_{\text{solv}}$ (a.u.) |
|--------------------------|--------------------------|-----------------------|-------------------------|-----------------------------------|
| -4433.798899             | 0.257375                 | -1261.759563          | -1261.882561            | -0.122997                         |

Cartesian coordinates of **12**

|    |           |           |           |
|----|-----------|-----------|-----------|
| Cu | -0.488898 | -0.036446 | -0.318168 |
| N  | -2.362342 | -0.694522 | -0.462077 |
| C  | -3.345534 | -0.395783 | 0.352632  |
| C  | -2.630147 | -1.625452 | -1.563823 |
| C  | -3.073008 | 0.579644  | 1.472408  |
| N  | -4.607622 | -0.877092 | 0.227823  |
| H  | -2.489048 | -2.657882 | -1.21521  |
| H  | -1.887381 | -1.448415 | -2.346346 |
| C  | -4.044595 | -1.443539 | -2.100708 |
| C  | -3.867378 | 1.897651  | 1.35084   |
| H  | -3.283493 | 0.1072    | 2.439568  |
| H  | -2.002548 | 0.792557  | 1.451502  |
| C  | -5.655307 | -0.617394 | 1.223881  |
| C  | -5.031519 | -1.632094 | -0.960315 |
| H  | -4.146713 | -0.435642 | -2.519824 |
| H  | -4.25844  | -2.162242 | -2.896924 |
| C  | -5.298339 | 1.829553  | 1.89339   |
| H  | -3.876525 | 2.2176    | 0.302358  |
| H  | -3.319766 | 2.66874   | 1.903305  |
| C  | -6.204581 | 0.812801  | 1.193071  |
| H  | -6.455939 | -1.329321 | 1.011407  |
| H  | -5.281518 | -0.859489 | 2.22453   |
| H  | -5.125277 | -2.694533 | -0.700235 |
| H  | -6.025604 | -1.275014 | -1.247754 |
| H  | -5.254133 | 1.579205  | 2.962495  |
| H  | -5.753543 | 2.825015  | 1.825698  |
| H  | -6.37295  | 1.101667  | 0.147459  |
| H  | -7.185159 | 0.812912  | 1.684212  |
| C  | -0.169196 | 1.933944  | -0.722087 |
| C  | 0.976088  | 1.473949  | -0.484237 |
| I  | 0.984861  | -2.345234 | 0.26073   |

|    |           |          |           |
|----|-----------|----------|-----------|
| C  | -1.287072 | 2.814911 | -1.012538 |
| O  | -1.513746 | 3.797636 | -0.304324 |
| C  | -2.155735 | 2.453734 | -2.189276 |
| H  | -1.541021 | 2.299325 | -3.08259  |
| H  | -2.664286 | 1.506637 | -1.979353 |
| H  | -2.89229  | 3.239856 | -2.367654 |
| Cu | 2.723317  | 0.942824 | -0.150083 |
| I  | 5.178067  | 0.450055 | 0.292809  |

| $E_{\text{elec}}$ (a.u.) | $G_{\text{corr}}$ (a.u.) | $E_{\text{g}}$ (a.u.) | $E_{\text{sol}}$ (a.u.) | $\Delta G^*_{\text{solv}}$ (a.u.) |
|--------------------------|--------------------------|-----------------------|-------------------------|-----------------------------------|
| -4567.169700             | 0.236907                 | -1108.970835          | -1109.087069            | -0.116233                         |

Cartesian coordinates of **13**

|    |           |           |           |
|----|-----------|-----------|-----------|
| Cu | 0.718753  | 1.309445  | -0.288631 |
| N  | 2.16374   | 0.09278   | 0.068332  |
| C  | 2.000146  | -1.211055 | 0.136617  |
| C  | 3.495691  | 0.645373  | 0.344971  |
| C  | 0.622787  | -1.769496 | -0.122479 |
| N  | 3.000413  | -2.081368 | 0.397143  |
| H  | 3.609101  | 0.79124   | 1.428111  |
| H  | 3.560703  | 1.630782  | -0.121628 |
| C  | 4.583757  | -0.281919 | -0.18018  |
| C  | 0.525495  | -2.62873  | -1.397384 |
| H  | 0.285413  | -2.346082 | 0.74681   |
| H  | -0.05983  | -0.919462 | -0.208906 |
| C  | 2.766498  | -3.525366 | 0.542736  |
| C  | 4.408382  | -1.655153 | 0.447245  |
| H  | 4.499808  | -0.3554   | -1.270839 |
| H  | 5.578419  | 0.106629  | 0.05556   |
| C  | 0.992218  | -4.077613 | -1.223921 |
| H  | 1.088411  | -2.139734 | -2.203313 |
| H  | -0.525165 | -2.635276 | -1.708764 |
| C  | 2.448272  | -4.238979 | -0.776088 |
| H  | 3.67957   | -3.935451 | 0.979058  |
| H  | 1.967685  | -3.696394 | 1.271614  |
| H  | 4.744871  | -1.651977 | 1.491625  |
| H  | 5.002029  | -2.402218 | -0.088643 |
| H  | 0.344747  | -4.5622   | -0.48002  |
| H  | 0.842162  | -4.617979 | -2.166267 |
| H  | 3.134606  | -3.870669 | -1.549575 |

|    |           |           |           |
|----|-----------|-----------|-----------|
| H  | 2.662044  | -5.306465 | -0.644815 |
| C  | -0.216117 | 3.15411   | -0.780358 |
| C  | -1.042275 | 2.225518  | -0.625226 |
| C  | 0.457771  | 4.418789  | -0.998585 |
| O  | -0.195685 | 5.42977   | -1.2586   |
| C  | 1.958945  | 4.422715  | -0.888262 |
| H  | 2.255847  | 4.077818  | 0.108302  |
| H  | 2.386292  | 3.722932  | -1.615367 |
| H  | 2.34528   | 5.428253  | -1.067244 |
| N  | -0.574782 | 0.711438  | 2.774555  |
| N  | 0.189753  | 1.617315  | 2.721317  |
| N  | 0.957457  | 2.519392  | 2.674785  |
| Cu | -2.05118  | 0.706229  | -0.267134 |
| I  | -3.497389 | -1.360323 | 0.111374  |

| $E_{\text{elec}}$ (a.u.) | $G_{\text{corr}}$ (a.u.) | $E_{\text{g}}$ (a.u.) | $E_{\text{sol}}$ (a.u.) | $\Delta G^*_{\text{solv}}$ (a.u.) |
|--------------------------|--------------------------|-----------------------|-------------------------|-----------------------------------|
| -4433.718799             | 0.248269                 | -1261.653318          | -1261.785866            | -0.132548                         |

Cartesian coordinates of **13-TS**

|    |           |           |           |
|----|-----------|-----------|-----------|
| Cu | 0.19823   | 1.30922   | -0.278231 |
| N  | -1.68939  | 1.377528  | -0.641534 |
| C  | -2.488211 | 0.338562  | -0.509871 |
| C  | -2.300225 | 2.684489  | -0.920888 |
| C  | -1.864845 | -1.006551 | -0.234772 |
| N  | -3.835754 | 0.414397  | -0.575214 |
| H  | -2.476684 | 2.781436  | -2.00146  |
| H  | -1.58887  | 3.462925  | -0.636811 |
| C  | -3.613145 | 2.836332  | -0.164035 |
| C  | -2.187865 | -1.55498  | 1.168574  |
| H  | -2.176706 | -1.727702 | -0.999682 |
| H  | -0.782468 | -0.88851  | -0.340618 |
| C  | -4.69332  | -0.776049 | -0.480644 |
| C  | -4.544698 | 1.705298  | -0.567361 |
| H  | -3.414907 | 2.794305  | 0.913344  |
| H  | -4.084998 | 3.798268  | -0.382927 |
| C  | -3.547172 | -2.254319 | 1.275539  |
| H  | -2.120452 | -0.736353 | 1.897071  |
| H  | -1.402814 | -2.272583 | 1.430905  |
| C  | -4.756865 | -1.380661 | 0.926704  |
| H  | -5.688238 | -0.456031 | -0.797258 |

|    |           |           |           |
|----|-----------|-----------|-----------|
| H  | -4.361705 | -1.526508 | -1.205159 |
| H  | -4.968967 | 1.885577  | -1.562957 |
| H  | -5.378594 | 1.622562  | 0.136604  |
| H  | -3.541885 | -3.123584 | 0.603276  |
| H  | -3.668695 | -2.648039 | 2.291763  |
| H  | -4.867984 | -0.565771 | 1.653795  |
| H  | -5.665413 | -1.990962 | 0.993855  |
| C  | 1.91153   | 1.915415  | 0.663046  |
| C  | 2.226097  | 0.991869  | -0.231752 |
| C  | 2.106378  | 2.983746  | 1.554206  |
| O  | 3.11078   | 3.064149  | 2.317786  |
| C  | 0.992372  | 4.0101    | 1.706604  |
| H  | 0.218266  | 3.908596  | 0.941175  |
| H  | 0.52623   | 3.902881  | 2.694121  |
| H  | 1.422388  | 5.016384  | 1.656412  |
| N  | 3.054665  | 1.445709  | -1.538041 |
| N  | 3.18866   | 2.684216  | -1.460762 |
| N  | 2.994009  | 3.714191  | -0.939477 |
| Cu | 1.856405  | -0.879812 | -0.196291 |
| I  | 1.511818  | -3.407825 | -0.020632 |

| $E_{\text{elec}}$ (a.u.) | $G_{\text{corr}}$ (a.u.) | $E_{\text{g}}$ (a.u.) | $E_{\text{sol}}$ (a.u.) | $\Delta G^*_{\text{solv}}$ (a.u.) |
|--------------------------|--------------------------|-----------------------|-------------------------|-----------------------------------|
| -4433.686573             | 0.251454                 | -1261.619936          | -1261.744862            | -0.124926                         |

Cartesian coordinates of **14**

|    |          |           |           |
|----|----------|-----------|-----------|
| Cu | 0.108967 | -1.306654 | -0.761693 |
| N  | 2.034689 | -1.217414 | -0.903036 |
| C  | 2.723119 | -0.148854 | -0.560489 |
| C  | 2.772965 | -2.469303 | -1.120659 |
| C  | 1.969851 | 1.138302  | -0.337676 |
| N  | 4.060952 | -0.144945 | -0.36547  |
| H  | 3.161025 | -2.490624 | -2.148889 |
| H  | 2.07201  | -3.301336 | -1.02137  |
| C  | 3.922901 | -2.596455 | -0.129511 |
| C  | 1.960164 | 1.590388  | 1.135348  |
| H  | 2.385259 | 1.931228  | -0.970966 |
| H  | 0.943516 | 0.964927  | -0.672846 |
| C  | 4.795611 | 1.078536  | -0.012977 |
| C  | 4.83851  | -1.393262 | -0.285025 |
| H  | 3.518335 | -2.631408 | 0.888797  |

|    |           |           |           |
|----|-----------|-----------|-----------|
| H  | 4.490133  | -3.515924 | -0.29921  |
| C  | 3.221081  | 2.344227  | 1.57131   |
| H  | 1.795254  | 0.714447  | 1.776183  |
| H  | 1.09288   | 2.244857  | 1.275474  |
| C  | 4.531864  | 1.565009  | 1.417262  |
| H  | 5.853926  | 0.840935  | -0.13941  |
| H  | 4.564488  | 1.86795   | -0.735004 |
| H  | 5.457236  | -1.487767 | -1.186164 |
| H  | 5.514347  | -1.310282 | 0.571722  |
| H  | 3.294554  | 3.265993  | 0.977485  |
| H  | 3.109008  | 2.656439  | 2.616555  |
| H  | 4.547419  | 0.697973  | 2.090397  |
| H  | 5.365087  | 2.212429  | 1.715784  |
| C  | -2.37344  | -2.188492 | 0.593949  |
| C  | -1.799293 | -1.596564 | -0.567624 |
| C  | -1.98249  | -2.03774  | 1.988433  |
| O  | -1.006146 | -1.349594 | 2.332992  |
| C  | -2.814542 | -2.745577 | 3.035658  |
| H  | -3.839687 | -2.359653 | 3.024601  |
| H  | -2.876981 | -3.816528 | 2.819173  |
| H  | -2.375701 | -2.589667 | 4.023302  |
| N  | -2.561859 | -2.064886 | -1.609759 |
| N  | -3.517463 | -2.88332  | -1.107501 |
| N  | -3.422008 | -2.968233 | 0.216499  |
| Cu | -1.602976 | 0.383196  | -0.489379 |
| I  | -1.951975 | 2.894214  | -0.207011 |

| $E_{\text{elec}}$ (a.u.) | $G_{\text{corr}}$ (a.u.) | $E_{\text{g}}$ (a.u.) | $E_{\text{sol}}$ (a.u.) | $\Delta G^*_{\text{solv}}$ (a.u.) |
|--------------------------|--------------------------|-----------------------|-------------------------|-----------------------------------|
| -4433.784937             | 0.254386                 | -1261.744944          | -1261.876467            | -0.131523                         |

Cartesian coordinates of **14-TS**

|   |           |           |           |
|---|-----------|-----------|-----------|
| C | -1.266776 | 0.017688  | -1.873175 |
| C | -1.277932 | -1.270311 | -2.443620 |
| C | -0.087833 | -1.744121 | -2.946391 |
| C | 1.092130  | -0.947594 | -2.928719 |
| C | 1.040828  | 0.379558  | -2.398396 |
| C | -0.195815 | 0.871043  | -1.882955 |
| H | -2.170941 | -1.882527 | -2.429972 |
| H | -0.037127 | -2.750564 | -3.352602 |
| H | -0.243892 | 1.887657  | -1.511741 |

|    |           |           |           |
|----|-----------|-----------|-----------|
| Cu | -2.285957 | 0.387234  | -0.223473 |
| C  | 2.335465  | -1.402920 | -3.428120 |
| H  | 2.412487  | -2.407299 | -3.834514 |
| C  | 3.425163  | -0.561551 | -3.386587 |
| H  | 4.396160  | -0.874887 | -3.754554 |
| C  | 3.263352  | 0.738274  | -2.854212 |
| H  | 4.115278  | 1.414302  | -2.823236 |
| N  | 2.121523  | 1.208620  | -2.379364 |
| N  | -2.127691 | -1.394545 | 0.555483  |
| C  | -1.034127 | -2.126257 | 0.888202  |
| N  | -3.278745 | -2.120531 | 0.723310  |
| C  | -1.594903 | -3.362317 | 1.288091  |
| Cu | 0.727727  | -1.467260 | 0.753321  |
| N  | -2.965613 | -3.308083 | 1.168507  |
| C  | -0.931003 | -4.573440 | 1.752490  |
| N  | 2.532824  | -0.831728 | 0.599684  |
| O  | -1.562014 | -5.583068 | 2.097219  |
| C  | 0.585328  | -4.587213 | 1.783896  |
| C  | 2.871642  | 0.438857  | 0.638625  |
| C  | 3.554474  | -1.828148 | 0.246267  |
| H  | 0.976160  | -4.605116 | 0.759809  |
| H  | 0.984819  | -3.688329 | 2.262643  |
| H  | 0.928913  | -5.480548 | 2.310962  |
| C  | 1.813251  | 1.446025  | 1.016100  |
| N  | 4.120379  | 0.898017  | 0.397404  |
| H  | 3.550345  | -1.980116 | -0.840317 |
| H  | 3.271786  | -2.779093 | 0.705590  |
| C  | 4.939255  | -1.395334 | 0.708229  |
| C  | 2.101107  | 2.197304  | 2.330753  |
| H  | 1.683600  | 2.159474  | 0.195517  |
| H  | 0.872686  | 0.898958  | 1.106695  |
| C  | 4.422650  | 2.332123  | 0.297724  |
| C  | 5.239333  | -0.016789 | 0.143380  |
| H  | 4.967655  | -1.361466 | 1.803669  |
| H  | 5.700085  | -2.106320 | 0.373784  |
| C  | 3.042771  | 3.396375  | 2.179090  |
| H  | 2.497143  | 1.491946  | 3.072958  |
| H  | 1.141863  | 2.555072  | 2.721243  |
| C  | 4.438546  | 3.058293  | 1.647042  |
| H  | 5.406197  | 2.400585  | -0.171563 |
| H  | 3.714407  | 2.809859  | -0.387441 |
| H  | 5.424936  | -0.072613 | -0.937602 |
| H  | 6.132065  | 0.408384  | 0.611571  |
| H  | 2.574782  | 4.117419  | 1.494465  |



|    |           |          |           |
|----|-----------|----------|-----------|
| H  | 3.138743  | 3.903259 | 3.146847  |
| H  | 4.988804  | 2.442217 | 2.369800  |
| H  | 5.006519  | 3.988566 | 1.525487  |
| I  | -2.363836 | 2.309606 | 1.671032  |
| Br | -3.369873 | 1.301939 | -2.207057 |

| $E_{\text{elec}}$ (a.u.) | $G_{\text{corr}}$ (a.u.) | $E_{\text{g}}$ (a.u.) | $E_{\text{sol}}$ (a.u.) | $\Delta G^*_{\text{solv}}$ (a.u.) |
|--------------------------|--------------------------|-----------------------|-------------------------|-----------------------------------|
| -7408.706759             | 0.369608                 | -1676.207508          | -1676.343027            | -0.135520                         |

Cartesian coordinates of **15**

|    |           |           |           |
|----|-----------|-----------|-----------|
| C  | -0.866244 | -0.329720 | 1.777056  |
| C  | -0.859362 | 0.637826  | 2.797247  |
| C  | 0.320732  | 0.847229  | 3.480858  |
| C  | 1.490113  | 0.102214  | 3.168528  |
| C  | 1.435281  | -0.898913 | 2.148052  |
| C  | 0.211433  | -1.102755 | 1.445737  |
| H  | -1.742473 | 1.227796  | 3.014932  |
| H  | 0.369887  | 1.602207  | 4.261132  |
| H  | 0.183651  | -1.860295 | 0.670928  |
| Cu | -2.29994  | -0.509729 | 0.495219  |
| C  | 2.730655  | 0.297654  | 3.825149  |
| H  | 2.809541  | 1.051968  | 4.603159  |
| C  | 3.812001  | -0.473461 | 3.464303  |
| H  | 4.778506  | -0.352663 | 3.941772  |
| C  | 3.646542  | -1.448125 | 2.451565  |
| H  | 4.491468  | -2.071353 | 2.165221  |
| N  | 2.510354  | -1.667510 | 1.812037  |
| N  | -2.037307 | 1.332545  | 0.091719  |
| C  | -0.982224 | 2.084748  | -0.304123 |
| N  | -3.167608 | 2.081137  | 0.289821  |
| C  | -1.554882 | 3.376365  | -0.363943 |
| Cu | 0.781422  | 1.450014  | -0.527748 |
| N  | -2.879672 | 3.321628  | 0.009300  |
| C  | -0.93727  | 4.650715  | -0.719306 |
| N  | 2.614683  | 0.880032  | -0.607384 |
| O  | -1.589012 | 5.702391  | -0.757586 |
| C  | 0.548508  | 4.669744  | -1.013149 |
| C  | 3.014495  | -0.303489 | -1.018700 |
| C  | 3.578672  | 1.739369  | 0.094574  |
| H  | 1.105842  | 4.548938  | -0.076444 |

|    |           |           |           |
|----|-----------|-----------|-----------|
| H  | 0.842557  | 3.844697  | -1.668338 |
| H  | 0.817541  | 5.628209  | -1.463351 |
| C  | 2.013893  | -1.193904 | -1.714847 |
| N  | 4.280853  | -0.760387 | -0.893497 |
| H  | 3.555054  | 1.506361  | 1.167470  |
| H  | 3.253438  | 2.776819  | -0.017622 |
| C  | 4.988413  | 1.550579  | -0.449269 |
| C  | 2.364461  | -1.501378 | -3.185025 |
| H  | 1.907166  | -2.128458 | -1.152697 |
| H  | 1.047473  | -0.687362 | -1.666188 |
| C  | 4.650243  | -2.145451 | -1.213296 |
| C  | 5.357496  | 0.079802  | -0.355351 |
| H  | 5.024788  | 1.878938  | -1.494535 |
| H  | 5.707985  | 2.149019  | 0.116703  |
| C  | 3.358813  | -2.652490 | -3.369435 |
| H  | 2.742867  | -0.589488 | -3.664960 |
| H  | 1.433543  | -1.760971 | -3.701255 |
| C  | 4.726654  | -2.435509 | -2.715938 |
| H  | 5.627150  | -2.310056 | -0.754216 |
| H  | 3.954205  | -2.834335 | -0.723173 |
| H  | 5.550609  | -0.204586 | 0.687398  |
| H  | 6.264885  | -0.130950 | -0.929694 |
| H  | 2.912440  | -3.564100 | -2.948443 |
| H  | 3.496683  | -2.839922 | -4.441115 |
| H  | 5.261830  | -1.611133 | -3.204471 |
| H  | 5.334523  | -3.337148 | -2.858169 |
| I  | -3.436873 | -1.114883 | -1.876707 |
| Br | -3.010497 | -2.381404 | 1.780211  |

| $E_{\text{elec}}$ (a.u.) | $G_{\text{corr}}$ (a.u.) | $E_{\text{g}}$ (a.u.) | $E_{\text{sol}}$ (a.u.) | $\Delta G^*_{\text{solv}}$ (a.u.) |
|--------------------------|--------------------------|-----------------------|-------------------------|-----------------------------------|
| -7408.709572             | 0.370307                 | -1676.205347          | -1676.339494            | -0.134147                         |

Cartesian coordinates of **15-TS**

|   |          |          |           |
|---|----------|----------|-----------|
| C | 2.199671 | 0.777739 | -0.123545 |
| C | 3.576030 | 0.929981 | -0.387614 |
| C | 4.130773 | 2.177675 | -0.203565 |
| C | 3.348566 | 3.265138 | 0.271993  |
| C | 1.964840 | 3.055270 | 0.575704  |
| C | 1.403777 | 1.763423 | 0.389719  |
| H | 4.170383 | 0.099281 | -0.748360 |

|    |           |           |           |
|----|-----------|-----------|-----------|
| H  | 5.182025  | 2.341517  | -0.424079 |
| H  | 0.365062  | 1.596065  | 0.652748  |
| Cu | 1.296890  | -0.694597 | -1.066964 |
| C  | 3.874566  | 4.563682  | 0.476648  |
| H  | 4.920801  | 4.756617  | 0.256250  |
| C  | 3.047896  | 5.556722  | 0.950313  |
| H  | 3.411473  | 6.564975  | 1.117564  |
| C  | 1.694717  | 5.245301  | 1.223194  |
| H  | 1.033851  | 6.023795  | 1.600556  |
| N  | 1.156632  | 4.049937  | 1.050090  |
| N  | 1.765374  | -1.083308 | 0.741288  |
| C  | 0.856945  | -1.197264 | 1.746491  |
| N  | 2.908886  | -1.811186 | 0.960806  |
| C  | 1.518083  | -2.090521 | 2.609989  |
| Cu | -0.822513 | -0.345410 | 1.679574  |
| N  | 2.753547  | -2.428627 | 2.092491  |
| C  | 1.066730  | -2.646559 | 3.884731  |
| N  | -2.521195 | 0.530399  | 1.541748  |
| O  | 1.769366  | -3.429484 | 4.533040  |
| C  | -0.299097 | -2.236142 | 4.391066  |
| C  | -2.980836 | 1.035207  | 0.414990  |
| C  | -3.327981 | 0.698973  | 2.758130  |
| H  | -0.355061 | -1.149061 | 4.510055  |
| H  | -1.075350 | -2.521254 | 3.673114  |
| H  | -0.490654 | -2.721305 | 5.350609  |
| C  | -2.154261 | 0.856273  | -0.835844 |
| N  | -4.166365 | 1.674729  | 0.306316  |
| H  | -3.092401 | 1.667507  | 3.221492  |
| H  | -3.039077 | -0.078834 | 3.468827  |
| C  | -4.814972 | 0.623172  | 2.437801  |
| C  | -2.823401 | -0.026483 | -1.906577 |
| H  | -1.897065 | 1.833735  | -1.260598 |
| H  | -1.213488 | 0.392975  | -0.530801 |
| C  | -4.606781 | 2.309180  | -0.944459 |
| C  | -5.149064 | 1.683500  | 1.401828  |
| H  | -5.050135 | -0.372396 | 2.043829  |
| H  | -5.418379 | 0.781668  | 3.335928  |
| C  | -3.846894 | 0.699132  | -2.785146 |
| H  | -3.285478 | -0.893929 | -1.417827 |
| H  | -2.025948 | -0.415688 | -2.547081 |
| C  | -5.029155 | 1.313880  | -2.030325 |
| H  | -5.448631 | 2.950672  | -0.675603 |
| H  | -3.817527 | 2.969551  | -1.318172 |
| H  | -5.169949 | 2.681571  | 1.857535  |

|    |           |           |           |
|----|-----------|-----------|-----------|
| H  | -6.135641 | 1.499495  | 0.965170  |
| H  | -3.328995 | 1.500818  | -3.330311 |
| H  | -4.224882 | 0.002268  | -3.542911 |
| H  | -5.643696 | 0.530027  | -1.568985 |
| H  | -5.672133 | 1.841790  | -2.744783 |
| I  | 0.068861  | -3.111228 | -1.628942 |
| Br | 1.158867  | 0.398344  | -3.210930 |

| $E_{\text{elec}}$ (a.u.) | $G_{\text{corr}}$ (a.u.) | $E_{\text{g}}$ (a.u.) | $E_{\text{sol}}$ (a.u.) | $\Delta G^*_{\text{solv}}$ (a.u.) |
|--------------------------|--------------------------|-----------------------|-------------------------|-----------------------------------|
| -7408.704857             | 0.370165                 | -1676.209906          | -1676.346256            | -0.136350                         |

Cartesian coordinates of **16**

|    |           |           |           |
|----|-----------|-----------|-----------|
| C  | -2.269762 | -1.985181 | -0.666281 |
| C  | -3.054035 | -2.669595 | 0.296480  |
| C  | -4.266860 | -2.148199 | 0.678779  |
| C  | -4.736496 | -0.922090 | 0.137498  |
| C  | -3.942453 | -0.245422 | -0.840846 |
| C  | -2.711661 | -0.815315 | -1.245905 |
| H  | -2.671474 | -3.582894 | 0.732746  |
| H  | -4.872789 | -2.660175 | 1.420683  |
| H  | -2.125944 | -0.311737 | -2.006327 |
| Cu | 1.048402  | -1.138443 | 0.666987  |
| C  | -5.960589 | -0.320780 | 0.521496  |
| H  | -6.585873 | -0.809477 | 1.263559  |
| C  | -6.330243 | 0.873418  | -0.051873 |
| H  | -7.257676 | 1.368280  | 0.216286  |
| C  | -5.473898 | 1.463032  | -1.013150 |
| H  | -5.758279 | 2.408520  | -1.471916 |
| N  | -4.325841 | 0.939924  | -1.406390 |
| N  | -1.002614 | -2.513036 | -1.019639 |
| C  | 0.161354  | -1.821127 | -1.262826 |
| N  | -0.835592 | -3.869318 | -1.089607 |
| C  | 1.052227  | -2.881692 | -1.525468 |
| Cu | 0.300092  | 0.076639  | -1.419957 |
| N  | 0.405939  | -4.089105 | -1.388138 |
| C  | 2.476740  | -2.830628 | -1.885843 |
| N  | 0.490099  | 1.985418  | -1.540013 |
| O  | 3.195494  | -3.827413 | -1.773465 |
| C  | 3.015917  | -1.544588 | -2.463296 |
| C  | -0.118808 | 2.811496  | -0.714935 |

|    |           |           |           |
|----|-----------|-----------|-----------|
| C  | 1.541223  | 2.523626  | -2.414290 |
| H  | 2.642866  | -1.437272 | -3.489655 |
| H  | 2.672061  | -0.674983 | -1.898637 |
| H  | 4.107223  | -1.576696 | -2.480522 |
| C  | -1.178856 | 2.250200  | 0.200677  |
| N  | 0.177464  | 4.125606  | -0.611819 |
| H  | 1.085234  | 2.920831  | -3.332162 |
| H  | 2.194978  | 1.698853  | -2.707282 |
| C  | 2.327448  | 3.618333  | -1.705017 |
| C  | -0.781147 | 2.283078  | 1.690031  |
| H  | -2.125335 | 2.782543  | 0.051062  |
| H  | -1.345578 | 1.216619  | -0.105135 |
| C  | -0.564978 | 5.029250  | 0.278856  |
| C  | 1.364915  | 4.706569  | -1.259633 |
| H  | 2.834774  | 3.186856  | -0.834913 |
| H  | 3.087754  | 4.045755  | -2.364760 |
| C  | -1.021770 | 3.629706  | 2.379306  |
| H  | 0.270526  | 1.985973  | 1.784620  |
| H  | -1.365463 | 1.513407  | 2.206462  |
| C  | -0.266090 | 4.813643  | 1.766943  |
| H  | -0.283858 | 6.042021  | -0.017506 |
| H  | -1.638457 | 4.933975  | 0.086501  |
| H  | 1.044886  | 5.319174  | -2.111986 |
| H  | 1.845160  | 5.372468  | -0.536198 |
| H  | -2.098037 | 3.849771  | 2.346014  |
| H  | -0.754949 | 3.541940  | 3.439350  |
| H  | 0.816930  | 4.686916  | 1.892470  |
| H  | -0.543030 | 5.727752  | 2.305677  |
| I  | 3.280079  | 0.316939  | 1.071050  |
| Br | -0.046554 | -2.225641 | 2.538709  |

| $E_{\text{elec}}$ (a.u.) | $G_{\text{corr}}$ (a.u.) | $E_{\text{g}}$ (a.u.) | $E_{\text{sol}}$ (a.u.) | $\Delta G^*_{\text{solv}}$ (a.u.) |
|--------------------------|--------------------------|-----------------------|-------------------------|-----------------------------------|
| -7408.787698             | 0.373084                 | -1676.334239          | -1676.466868            | -0.132630                         |

Cartesian coordinates of **16-TS**

|   |          |           |           |
|---|----------|-----------|-----------|
| C | 1.867208 | 0.969965  | -0.426320 |
| C | 2.348055 | 0.611755  | -1.707706 |
| C | 3.603636 | 0.061207  | -1.789729 |
| C | 4.410901 | -0.106034 | -0.629284 |
| C | 3.918698 | 0.326962  | 0.642779  |

|    |           |           |           |
|----|-----------|-----------|-----------|
| C  | 2.628943  | 0.922590  | 0.718305  |
| H  | 1.723606  | 0.722152  | -2.586244 |
| H  | 3.990236  | -0.267558 | -2.750386 |
| H  | 2.274532  | 1.286034  | 1.676594  |
| Br | 0.411723  | 2.841197  | -0.501856 |
| Cu | 0.021944  | 0.467514  | 0.064761  |
| I  | 0.253077  | -2.236451 | -0.326486 |
| N  | -1.746676 | 0.429519  | 0.954081  |
| C  | -2.898988 | 0.484180  | 0.331287  |
| C  | -1.729541 | 0.228217  | 2.406350  |
| C  | -2.887273 | 0.622684  | -1.172143 |
| N  | -4.096570 | 0.376711  | 0.951298  |
| H  | -1.767787 | 1.203011  | 2.912562  |
| H  | -0.776247 | -0.237663 | 2.671312  |
| C  | -2.899935 | -0.640963 | 2.848257  |
| C  | -3.458635 | -0.607270 | -1.907591 |
| H  | -3.431642 | 1.526031  | -1.471964 |
| H  | -1.847824 | 0.770387  | -1.472459 |
| C  | -5.371647 | 0.533673  | 0.238197  |
| C  | -4.195523 | -0.007329 | 2.368024  |
| H  | -2.790058 | -1.640801 | 2.412912  |
| H  | -2.921406 | -0.746233 | 3.936497  |
| C  | -4.987251 | -0.633999 | -2.009161 |
| H  | -3.091583 | -1.518022 | -1.419021 |
| H  | -3.042774 | -0.609120 | -2.921270 |
| C  | -5.725162 | -0.650813 | -0.667190 |
| H  | -6.134776 | 0.657226  | 1.009486  |
| H  | -5.358205 | 1.464167  | -0.338898 |
| H  | -4.441582 | 0.878798  | 2.967169  |
| H  | -5.026804 | -0.712212 | 2.464720  |
| H  | -5.313362 | 0.250123  | -2.574466 |
| H  | -5.289538 | -1.508361 | -2.597818 |
| H  | -5.519112 | -1.582093 | -0.124128 |
| H  | -6.805099 | -0.625528 | -0.855963 |
| C  | 5.704682  | -0.677269 | -0.670990 |
| H  | 6.109266  | -1.014699 | -1.620873 |
| C  | 6.423358  | -0.796903 | 0.496962  |
| H  | 7.416464  | -1.232915 | 0.508458  |
| C  | 5.845063  | -0.338421 | 1.703837  |
| H  | 6.405525  | -0.429263 | 2.632542  |
| N  | 4.643086  | 0.205950  | 1.792988  |

| $E_{\text{elec}}$ (a.u.) | $G_{\text{corr}}$ (a.u.) | $E_{\text{g}}$ (a.u.) | $E_{\text{sol}}$ (a.u.) | $\Delta G^*_{\text{solv}}$ (a.u.) |
|--------------------------|--------------------------|-----------------------|-------------------------|-----------------------------------|
| -5374.718855             | 0.310520                 | -1085.192298          | -1085.240122            | -0.047824                         |

Cartesian coordinates of **17**

|    |           |           |           |
|----|-----------|-----------|-----------|
| C  | -1.893885 | 0.083494  | 0.286493  |
| C  | -2.207532 | -0.329790 | 1.600930  |
| C  | -3.529149 | -0.512052 | 1.949162  |
| C  | -4.565256 | -0.294413 | 1.003775  |
| C  | -4.226298 | 0.119766  | -0.324329 |
| C  | -2.855907 | 0.299474  | -0.664780 |
| H  | -1.421580 | -0.503170 | 2.328736  |
| H  | -3.790966 | -0.829592 | 2.955226  |
| H  | -2.616104 | 0.609760  | -1.676560 |
| Br | -0.398408 | 2.703177  | 0.485464  |
| Cu | -0.036252 | 0.389506  | -0.125256 |
| I  | 0.032443  | -2.108388 | -0.811159 |
| N  | 1.836574  | 0.717703  | -0.588181 |
| C  | 2.857230  | 0.511047  | 0.205858  |
| C  | 2.052021  | 1.265525  | -1.928081 |
| C  | 2.594993  | -0.077283 | 1.569882  |
| N  | 4.137884  | 0.761116  | -0.146141 |
| H  | 2.023795  | 2.361910  | -1.880854 |
| H  | 1.221186  | 0.945893  | -2.564022 |
| C  | 3.383277  | 0.786210  | -2.492616 |
| C  | 3.176687  | -1.496142 | 1.745726  |
| H  | 2.991585  | 0.589904  | 2.344118  |
| H  | 1.512817  | -0.106606 | 1.711146  |
| C  | 5.259641  | 0.584407  | 0.787234  |
| C  | 4.495209  | 1.146723  | -1.520329 |
| H  | 3.346767  | -0.300095 | -2.631687 |
| H  | 3.580726  | 1.246438  | -3.464674 |
| C  | 4.665302  | -1.530837 | 2.106819  |
| H  | 2.993294  | -2.072562 | 0.831690  |
| H  | 2.611707  | -1.990445 | 2.543663  |
| C  | 5.596418  | -0.881859 | 1.078087  |
| H  | 6.115326  | 1.081671  | 0.326438  |
| H  | 5.051853  | 1.120887  | 1.718938  |
| H  | 4.703874  | 2.223749  | -1.549703 |
| H  | 5.418993  | 0.623360  | -1.783146 |
| H  | 4.802718  | -1.021482 | 3.070622  |
| H  | 4.968916  | -2.573356 | 2.259803  |

|   |           |           |           |
|---|-----------|-----------|-----------|
| H | 5.578768  | -1.440115 | 0.133252  |
| H | 6.625456  | -0.926854 | 1.454119  |
| C | -5.937767 | -0.471333 | 1.307081  |
| H | -6.226710 | -0.787326 | 2.305850  |
| C | -6.878034 | -0.239025 | 0.330236  |
| H | -7.938589 | -0.362667 | 0.522470  |
| C | -6.439633 | 0.170650  | -0.951495 |
| H | -7.175909 | 0.358273  | -1.731648 |
| N | -5.172419 | 0.347285  | -1.284121 |

| $E_{\text{elec}}$ (a.u.) | $G_{\text{corr}}$ (a.u.) | $E_{\text{g}}$ (a.u.) | $E_{\text{sol}}$ (a.u.) | $\Delta G^*_{\text{solv}}$ (a.u.) |
|--------------------------|--------------------------|-----------------------|-------------------------|-----------------------------------|
| -5374.733313             | 0.311388                 | -1085.194752          | -1085.239054            | -0.044302                         |

Cartesian coordinates of **17-TS**

|    |           |           |           |
|----|-----------|-----------|-----------|
| C  | 1.863368  | -0.658215 | -0.191423 |
| C  | 2.539398  | -0.866876 | -1.421245 |
| C  | 3.854813  | -0.490509 | -1.519213 |
| C  | 4.543014  | 0.076499  | -0.408405 |
| C  | 3.855168  | 0.241632  | 0.834933  |
| C  | 2.500376  | -0.179845 | 0.935387  |
| H  | 2.011057  | -1.283123 | -2.270173 |
| H  | 4.387756  | -0.611937 | -2.458462 |
| H  | 2.002959  | -0.111077 | 1.896305  |
| Cu | 0.046105  | 0.128691  | -0.159758 |
| N  | -1.653941 | 0.790126  | 0.640039  |
| C  | -2.843298 | 0.666299  | 0.105193  |
| C  | -1.490625 | 1.679535  | 1.793381  |
| C  | -2.997516 | -0.252587 | -1.08201  |
| N  | -3.953505 | 1.283249  | 0.576993  |
| H  | -1.299626 | 2.70276   | 1.440789  |
| H  | -0.605131 | 1.35952   | 2.349575  |
| C  | -2.727688 | 1.650401  | 2.682428  |
| C  | -3.869976 | -1.491406 | -0.792987 |
| H  | -3.405262 | 0.303591  | -1.934409 |
| H  | -1.995699 | -0.575065 | -1.368992 |
| C  | -5.256848 | 1.18341   | -0.09326  |
| C  | -3.944705 | 2.020299  | 1.849991  |
| H  | -2.851675 | 0.643137  | 3.09683   |
| H  | -2.626204 | 2.348124  | 3.518486  |
| C  | -5.378694 | -1.245504 | -0.900671 |



|    |           |           |           |
|----|-----------|-----------|-----------|
| H  | -3.618059 | -1.88288  | 0.200675  |
| H  | -3.591837 | -2.269208 | -1.513078 |
| C  | -5.930998 | -0.184622 | 0.056216  |
| H  | -5.883602 | 1.959415  | 0.351095  |
| H  | -5.147992 | 1.440213  | -1.152283 |
| H  | -3.961452 | 3.09823   | 1.643585  |
| H  | -4.866293 | 1.773539  | 2.386417  |
| H  | -5.606974 | -0.93705  | -1.930402 |
| H  | -5.907897 | -2.191577 | -0.735096 |
| H  | -5.830797 | -0.513791 | 1.098561  |
| H  | -7.003479 | -0.058924 | -0.135181 |
| C  | 6.492406  | 1.001578  | 0.660984  |
| H  | 7.529176  | 1.32055   | 0.658099  |
| C  | 5.724606  | 1.123184  | 1.842142  |
| H  | 6.184411  | 1.537265  | 2.737841  |
| Br | 0.4342    | 1.96252   | -1.846282 |
| N  | 4.456012  | 0.762313  | 1.944807  |
| C  | 5.898892  | 0.475385  | -0.464866 |
| H  | 6.451077  | 0.361182  | -1.393466 |
| I  | 0.191913  | -2.437262 | 0.326676  |

| $E_{\text{elec}}$ (a.u.) | $G_{\text{corr}}$ (a.u.) | $E_{\text{g}}$ (a.u.) | $E_{\text{sol}}$ (a.u.) | $\Delta G^*_{\text{solv}}$ (a.u.) |
|--------------------------|--------------------------|-----------------------|-------------------------|-----------------------------------|
| -5374.725450             | 0.309191                 | -1085.200061          | -1085.245896            | -0.045835                         |

Cartesian coordinates of **18**

|   |          |           |           |
|---|----------|-----------|-----------|
| C | -0.05423 | 1.583232  | 0.000232  |
| C | 1.294929 | 1.856844  | 0.000403  |
| C | 2.25081  | 0.80891   | 0.000336  |
| C | 1.798383 | -0.547069 | 0.000087  |
| C | 0.402967 | -0.815087 | -0.000088 |
| C | -0.48345 | 0.234544  | -0.000012 |
| H | 4.024792 | 2.056613  | 0.000706  |
| H | -0.77986 | 2.38827   | 0.000285  |
| H | 1.641079 | 2.886536  | 0.000595  |
| C | 3.649963 | 1.036979  | 0.000507  |
| H | 0.077741 | -1.848812 | -0.000279 |
| C | 3.95374  | -1.346079 | 0.00016   |
| C | 4.503339 | -0.040658 | 0.000422  |
| H | 4.622733 | -2.205234 | 0.000107  |
| H | 5.5804   | 0.088857  | 0.000551  |

|   |           |           |           |
|---|-----------|-----------|-----------|
| N | 2.659131  | -1.609176 | 0.000004  |
| I | -2.597727 | -0.164749 | -0.000269 |

| $E_{\text{elec}}$ (a.u.) | $G_{\text{corr}}$ (a.u.) | $E_{\text{g}}$ (a.u.) | $E_{\text{sol}}$ (a.u.) | $\Delta G^*_{\text{solv}}$ (a.u.) |
|--------------------------|--------------------------|-----------------------|-------------------------|-----------------------------------|
| -698.6826904             | 0.087137                 | -412.5175102          | -412.5301178            | -0.012608                         |

Cartesian coordinates of **18-TS**

|    |           |           |           |
|----|-----------|-----------|-----------|
| C  | 1.881051  | 0.713082  | -0.256828 |
| C  | 2.383035  | 0.534857  | -1.569553 |
| C  | 3.636253  | -0.006253 | -1.721407 |
| C  | 4.425957  | -0.356974 | -0.589973 |
| C  | 3.915927  | -0.12225  | 0.726093  |
| C  | 2.628844  | 0.467527  | 0.871763  |
| H  | 1.773195  | 0.78627   | -2.429075 |
| H  | 4.036122  | -0.185787 | -2.715731 |
| H  | 2.262717  | 0.682514  | 1.870019  |
| Cu | 0.019306  | 0.328775  | 0.164327  |
| I  | 0.057099  | -2.329268 | -0.798313 |
| N  | -1.73119  | 0.079225  | 1.075593  |
| C  | -2.916457 | 0.272376  | 0.548286  |
| C  | -1.638391 | -0.59449  | 2.375899  |
| C  | -2.995186 | 0.911076  | -0.81598  |
| N  | -4.072835 | -0.109533 | 1.138574  |
| H  | -1.717613 | 0.148999  | 3.181349  |
| H  | -0.647674 | -1.05056  | 2.450618  |
| C  | -2.731802 | -1.645353 | 2.52049   |
| C  | -3.54269  | -0.035347 | -1.904641 |
| H  | -3.606506 | 1.820261  | -0.769576 |
| H  | -1.985724 | 1.226854  | -1.077386 |
| C  | -5.389372 | 0.199632  | 0.563628  |
| C  | -4.08345  | -0.978511 | 2.325836  |
| H  | -2.58442  | -2.421871 | 1.76145   |
| H  | -2.692443 | -2.120666 | 3.504553  |
| C  | -5.071371 | -0.123527 | -1.958149 |
| H  | -3.106659 | -1.032136 | -1.764346 |
| H  | -3.181168 | 0.328784  | -2.872892 |
| C  | -5.735113 | -0.633439 | -0.675344 |
| H  | -6.116217 | 0.012016  | 1.356796  |
| H  | -5.448369 | 1.26835   | 0.333489  |
| H  | -4.355158 | -0.38329  | 3.206963  |

|   |           |           |           |
|---|-----------|-----------|-----------|
| H | -4.866084 | -1.72972  | 2.18132   |
| H | -5.468895 | 0.876474  | -2.181123 |
| H | -5.363228 | -0.767885 | -2.796062 |
| H | -5.457086 | -1.678076 | -0.485182 |
| H | -6.823596 | -0.613779 | -0.807253 |
| C | 5.71678   | -0.926283 | -0.700456 |
| H | 6.135107  | -1.114323 | -1.68522  |
| C | 6.415472  | -1.233636 | 0.445132  |
| H | 7.405523  | -1.674893 | 0.403378  |
| C | 5.820338  | -0.964147 | 1.699759  |
| H | 6.364613  | -1.204705 | 2.61139   |
| N | 4.621016  | -0.428407 | 1.854155  |
| I | 0.449426  | 2.888393  | -0.104112 |

| $E_{\text{elec}}$ (a.u.) | $G_{\text{corr}}$ (a.u.) | $E_{\text{g}}$ (a.u.) | $E_{\text{sol}}$ (a.u.) | $\Delta G^*_{\text{solv}}$ (a.u.) |
|--------------------------|--------------------------|-----------------------|-------------------------|-----------------------------------|
| -3098.495812             | 0.310471                 | -1083.233475          | -1083.286136            | -0.052660                         |

Cartesian coordinates of **19**

|    |           |           |           |
|----|-----------|-----------|-----------|
| C  | -1.889336 | -0.056573 | 0.250636  |
| C  | -2.247393 | -0.132572 | 1.616982  |
| C  | -3.577009 | -0.246983 | 1.959596  |
| C  | -4.582612 | -0.293084 | 0.957975  |
| C  | -4.201922 | -0.224746 | -0.420471 |
| C  | -2.821742 | -0.104037 | -0.752542 |
| H  | -1.484937 | -0.093172 | 2.387829  |
| H  | -3.871519 | -0.300568 | 3.004572  |
| H  | -2.551508 | -0.049809 | -1.802393 |
| Cu | -0.022039 | 0.145236  | -0.201481 |
| I  | 0.114578  | -2.445662 | -0.226171 |
| N  | 1.830528  | 0.351832  | -0.815638 |
| C  | 2.887906  | 0.404522  | -0.044762 |
| C  | 1.987824  | 0.331642  | -2.270589 |
| C  | 2.682061  | 0.398069  | 1.449792  |
| N  | 4.151963  | 0.430557  | -0.521515 |
| H  | 2.021908  | 1.361814  | -2.650798 |
| H  | 1.10255   | -0.145699 | -2.699755 |
| C  | 3.254451  | -0.42321  | -2.654857 |
| C  | 3.256631  | -0.854352 | 2.143856  |
| H  | 3.120225  | 1.303312  | 1.886636  |
| H  | 1.607183  | 0.456812  | 1.628741  |

|   |           |           |           |
|---|-----------|-----------|-----------|
| C | 5.320735  | 0.601505  | 0.352713  |
| C | 4.442003  | 0.209443  | -1.946865 |
| H | 3.152882  | -1.471588 | -2.352882 |
| H | 3.413377  | -0.39562  | -3.736316 |
| C | 4.760437  | -0.788777 | 2.430426  |
| H | 3.021025  | -1.738231 | 1.53909   |
| H | 2.726666  | -0.977547 | 3.09481   |
| C | 5.650561  | -0.6361   | 1.193464  |
| H | 6.157088  | 0.841158  | -0.307248 |
| H | 5.172521  | 1.473506  | 0.997956  |
| H | 4.706994  | 1.167009  | -2.412602 |
| H | 5.31818   | -0.44281  | -2.010321 |
| H | 4.94995   | 0.060177  | 3.10187   |
| H | 5.057481  | -1.690831 | 2.978514  |
| H | 5.580995  | -1.525171 | 0.553625  |
| H | 6.6955    | -0.558569 | 1.516741  |
| C | -5.963178 | -0.402739 | 1.254565  |
| H | -6.283434 | -0.454364 | 2.2917    |
| C | -6.872033 | -0.441527 | 0.222382  |
| H | -7.937768 | -0.52428  | 0.407738  |
| C | -6.393338 | -0.371088 | -1.107126 |
| H | -7.103944 | -0.401955 | -1.93179  |
| N | -5.116424 | -0.266227 | -1.434818 |
| I | -0.38173  | 2.718588  | 0.074284  |

| $E_{\text{elec}}$ (a.u.) | $G_{\text{corr}}$ (a.u.) | $E_{\text{g}}$ (a.u.) | $E_{\text{sol}}$ (a.u.) | $\Delta G^*_{\text{solv}}$ (a.u.) |
|--------------------------|--------------------------|-----------------------|-------------------------|-----------------------------------|
| -3098.506918             | 0.310759                 | -1083.234399          | -1083.282399            | -0.048000                         |

Cartesian coordinates of **19-TS**

|    |           |           |           |
|----|-----------|-----------|-----------|
| Cu | -0.022787 | 0.087615  | 0.060232  |
| N  | -1.918586 | 0.509056  | 0.403439  |
| C  | -2.908403 | 0.155496  | -0.377698 |
| C  | -2.191456 | 1.243034  | 1.641572  |
| C  | -2.600323 | -0.642294 | -1.621906 |
| N  | -4.205737 | 0.433066  | -0.109095 |
| H  | -2.176228 | 2.321221  | 1.434547  |
| H  | -1.375749 | 1.037654  | 2.337342  |
| C  | -3.534502 | 0.828263  | 2.226715  |
| C  | -3.164553 | -2.078495 | -1.581832 |
| H  | -2.981497 | -0.114506 | -2.503915 |

|   |           |           |           |
|---|-----------|-----------|-----------|
| H | -1.516099 | -0.681528 | -1.732646 |
| C | -5.293057 | 0.097674  | -1.038783 |
| C | -4.617674 | 1.015223  | 1.177537  |
| H | -3.487443 | -0.223892 | 2.53031   |
| H | -3.771389 | 1.424408  | 3.112475  |
| C | -4.638957 | -2.192638 | -1.982967 |
| H | -3.00799  | -2.496577 | -0.58028  |
| H | -2.568368 | -2.688216 | -2.26982  |
| C | -5.611586 | -1.399737 | -1.104756 |
| H | -6.16709  | 0.651694  | -0.690543 |
| H | -5.05831  | 0.48269   | -2.036608 |
| H | -4.842743 | 2.080226  | 1.036946  |
| H | -5.543038 | 0.519567  | 1.486015  |
| H | -4.744894 | -1.845113 | -3.020033 |
| H | -4.928763 | -3.250224 | -1.978193 |
| H | -5.625588 | -1.800645 | -0.083094 |
| H | -6.625866 | -1.515569 | -1.505231 |
| I | -0.145311 | -2.143378 | 1.397017  |
| N | 0.432864  | 3.806103  | 2.163998  |
| N | 0.725941  | 2.699913  | 2.460543  |
| N | 1.014547  | 1.589318  | 2.772719  |
| C | 1.815182  | -0.368747 | -0.344758 |
| C | 2.032118  | -1.159613 | -1.497912 |
| C | 2.843266  | 0.074233  | 0.444742  |
| C | 3.32101   | -1.500306 | -1.847686 |
| H | 1.195461  | -1.494857 | -2.102311 |
| C | 4.182171  | -0.267041 | 0.099769  |
| H | 2.659286  | 0.682438  | 1.326547  |
| C | 4.422958  | -1.065601 | -1.064628 |
| H | 3.507698  | -2.106602 | -2.730513 |
| N | 5.196696  | 0.186231  | 0.896269  |
| C | 5.766957  | -1.382819 | -1.379743 |
| C | 6.434115  | -0.136255 | 0.560422  |
| H | 5.981113  | -1.986551 | -2.257663 |
| C | 6.776108  | -0.91875  | -0.567811 |
| H | 7.225166  | 0.236592  | 1.209576  |
| H | 7.818072  | -1.13892  | -0.77503  |
| I | 0.329741  | 2.199799  | -1.444402 |

| $E_{\text{elec}}$ (a.u.) | $G_{\text{corr}}$ (a.u.) | $E_{\text{g}}$ (a.u.) | $E_{\text{sol}}$ (a.u.) | $\Delta G^*_{\text{solv}}$ (a.u.) |
|--------------------------|--------------------------|-----------------------|-------------------------|-----------------------------------|
| -3262.718966             | 0.315554                 | -1247.406946          | -1247.537549            | -0.130604                         |

Cartesian coordinates of **20**

|    |           |           |           |
|----|-----------|-----------|-----------|
| C  | -1.851452 | 0.079628  | 0.245197  |
| C  | -2.170504 | -0.277315 | 1.575561  |
| C  | -3.494854 | -0.417743 | 1.932646  |
| C  | -4.52811  | -0.216821 | 0.98059   |
| C  | -4.185072 | 0.134003  | -0.364432 |
| C  | -2.812472 | 0.275308  | -0.713317 |
| H  | -1.38561  | -0.43724  | 2.307758  |
| H  | -3.7619   | -0.688794 | 2.950835  |
| H  | -2.567951 | 0.545649  | -1.735687 |
| Cu | -0.018548 | 0.502851  | -0.126598 |
| N  | 1.861702  | 0.937063  | -0.556634 |
| C  | 2.892884  | 0.77636   | 0.233442  |
| C  | 2.062749  | 1.422663  | -1.922667 |
| C  | 2.654567  | 0.25266   | 1.628346  |
| N  | 4.168025  | 1.021736  | -0.145606 |
| H  | 2.042125  | 2.521046  | -1.928334 |
| H  | 1.222516  | 1.078981  | -2.532692 |
| C  | 3.385677  | 0.9126    | -2.481273 |
| C  | 3.267827  | -1.142267 | 1.873405  |
| H  | 3.047251  | 0.966417  | 2.36231   |
| H  | 1.574677  | 0.212395  | 1.781539  |
| C  | 5.300453  | 0.922927  | 0.785677  |
| C  | 4.510604  | 1.322861  | -1.544325 |
| H  | 3.344672  | -0.179591 | -2.560468 |
| H  | 3.570989  | 1.318609  | -3.479544 |
| C  | 4.758639  | -1.126237 | 2.227004  |
| H  | 3.092249  | -1.769556 | 0.991747  |
| H  | 2.718     | -1.606341 | 2.699704  |
| C  | 5.671006  | -0.516597 | 1.158168  |
| H  | 6.141655  | 1.410311  | 0.288727  |
| H  | 5.088913  | 1.508172  | 1.686691  |
| H  | 4.724413  | 2.395067  | -1.639996 |
| H  | 5.429023  | 0.779946  | -1.786851 |
| H  | 4.889646  | -0.560978 | 3.160143  |
| H  | 5.085082  | -2.151944 | 2.43636   |
| H  | 5.661475  | -1.128185 | 0.246783  |
| H  | 6.702523  | -0.517632 | 1.530233  |
| C  | -5.903378 | -0.344638 | 1.296367  |
| H  | -6.195442 | -0.610076 | 2.308794  |
| C  | -6.841726 | -0.128158 | 0.314289  |
| H  | -7.904267 | -0.21428  | 0.515709  |
| C  | -6.39882  | 0.214753  | -0.985437 |
| H  | -7.133741 | 0.388575  | -1.770031 |

|   |           |           |           |
|---|-----------|-----------|-----------|
| N | -5.129046 | 0.343589  | -1.329959 |
| N | -0.37807  | 2.375675  | 0.273781  |
| N | -1.46355  | 2.754584  | 0.661164  |
| N | -2.473861 | 3.173265  | 1.031065  |
| I | 0.210322  | -1.980161 | -0.776123 |

| $E_{\text{elec}}$ (a.u.) | $G_{\text{corr}}$ (a.u.) | $E_{\text{g}}$ (a.u.) | $E_{\text{sol}}$ (a.u.) | $\Delta G^*_{\text{solv}}$ (a.u.) |
|--------------------------|--------------------------|-----------------------|-------------------------|-----------------------------------|
| -2965.085250             | 0.322092                 | -1235.952505          | -1235.998489            | -0.045984                         |

Cartesian coordinates of **20-TS**

|    |           |           |           |
|----|-----------|-----------|-----------|
| C  | -1.905907 | 0.578981  | 0.769902  |
| C  | -2.198697 | -0.215951 | 1.90104   |
| C  | -3.461977 | -0.750427 | 2.007203  |
| C  | -4.458824 | -0.468683 | 1.032796  |
| C  | -4.145112 | 0.392017  | -0.069638 |
| C  | -2.83765  | 0.939106  | -0.171099 |
| H  | -1.43691  | -0.41532  | 2.646885  |
| H  | -3.713685 | -1.391472 | 2.847635  |
| H  | -2.60545  | 1.587042  | -1.010359 |
| Cu | 0.002586  | 0.505783  | 0.228978  |
| N  | 1.913883  | 0.999214  | -0.133136 |
| C  | 2.974252  | 0.499011  | 0.450294  |
| C  | 2.089447  | 1.994453  | -1.194844 |
| C  | 2.769215  | -0.540252 | 1.525979  |
| N  | 4.244141  | 0.834301  | 0.121643  |
| H  | 2.145163  | 2.999526  | -0.753478 |
| H  | 1.200678  | 1.97104   | -1.832569 |
| C  | 3.348265  | 1.704715  | -2.0037   |
| C  | 3.330575  | -1.930258 | 1.161321  |
| H  | 3.214123  | -0.193633 | 2.466715  |
| H  | 1.693312  | -0.616479 | 1.695137  |
| C  | 5.409778  | 0.342326  | 0.868035  |
| C  | 4.540693  | 1.656578  | -1.061361 |
| H  | 3.235157  | 0.740508  | -2.512325 |
| H  | 3.511447  | 2.471569  | -2.766082 |
| C  | 4.833398  | -2.094655 | 1.411027  |
| H  | 3.091839  | -2.148939 | 0.113557  |
| H  | 2.794291  | -2.672534 | 1.762993  |
| C  | 5.728614  | -1.135871 | 0.620472  |
| H  | 6.251669  | 0.963681  | 0.55537   |

|   |           |           |           |
|---|-----------|-----------|-----------|
| H | 5.266309  | 0.527043  | 1.938012  |
| H | 4.820995  | 2.667371  | -0.737845 |
| H | 5.409231  | 1.21857   | -1.562917 |
| H | 5.026404  | -1.947237 | 2.482823  |
| H | 5.121511  | -3.127751 | 1.182578  |
| H | 5.653482  | -1.33586  | -0.456126 |
| H | 6.773402  | -1.311183 | 0.903887  |
| C | -6.679757 | -0.667553 | 0.121363  |
| H | -7.694145 | -1.051409 | 0.137275  |
| C | -6.269087 | 0.187867  | -0.927969 |
| H | -6.979425 | 0.450787  | -1.710175 |
| N | -0.623077 | 2.031822  | 1.29891   |
| N | -0.93842  | 3.022412  | 0.654469  |
| N | -1.267928 | 3.982812  | 0.114635  |
| N | -5.057632 | 0.706455  | -1.036647 |
| C | -5.77142  | -0.993291 | 1.102848  |
| H | -6.041496 | -1.646108 | 1.928238  |
| I | -0.160085 | -1.706315 | -1.252089 |

| $E_{\text{elec}}$ (a.u.) | $G_{\text{corr}}$ (a.u.) | $E_{\text{g}}$ (a.u.) | $E_{\text{sol}}$ (a.u.) | $\Delta G^*_{\text{solv}}$ (a.u.) |
|--------------------------|--------------------------|-----------------------|-------------------------|-----------------------------------|
| -2965.066565             | 0.321552                 | -1235.947908          | -1235.996615            | -0.048707                         |

Cartesian coordinates of **21-TS**

|    |          |           |           |
|----|----------|-----------|-----------|
| Cu | 0.013769 | -0.097187 | 0.413817  |
| N  | 1.907331 | 0.246281  | 0.846877  |
| C  | 2.895383 | -0.484732 | 0.397162  |
| C  | 2.204974 | 1.383963  | 1.718756  |
| C  | 2.579523 | -1.657388 | -0.499197 |
| N  | 4.195892 | -0.223354 | 0.670708  |
| H  | 2.301680 | 1.028014  | 2.754588  |
| H  | 1.351574 | 2.063502  | 1.690783  |
| C  | 3.493934 | 2.062785  | 1.272484  |
| C  | 3.159291 | -1.530645 | -1.923177 |
| H  | 2.932564 | -2.583738 | -0.030442 |
| H  | 1.492566 | -1.738078 | -0.557087 |
| C  | 5.282113 | -1.133070 | 0.283826  |
| C  | 4.619674 | 1.041702  | 1.292326  |
| H  | 3.359556 | 2.457607  | 0.258983  |
| H  | 3.744476 | 2.899946  | 1.930178  |
| C  | 4.629018 | -1.942947 | -2.054045 |



|    |           |           |           |
|----|-----------|-----------|-----------|
| H  | 3.020753  | -0.502298 | -2.276674 |
| H  | 2.558514  | -2.168683 | -2.580958 |
| C  | 5.606048  | -1.116463 | -1.213305 |
| H  | 6.155412  | -0.819337 | 0.859971  |
| H  | 5.042791  | -2.150655 | 0.610147  |
| H  | 4.944914  | 0.843522  | 2.321491  |
| H  | 5.488417  | 1.411141  | 0.737539  |
| H  | 4.723404  | -2.998020 | -1.761459 |
| H  | 4.922123  | -1.885225 | -3.109153 |
| H  | 5.626661  | -0.074420 | -1.557512 |
| H  | 6.618464  | -1.515749 | -1.348309 |
| I  | 0.116367  | 1.244174  | -1.800483 |
| N  | -1.124582 | 4.294322  | 0.297657  |
| N  | -1.050577 | 3.402379  | 1.069181  |
| N  | -0.977772 | 2.509720  | 1.852761  |
| C  | -1.808538 | -0.520606 | -0.075785 |
| C  | -2.015678 | -1.645804 | -0.907585 |
| C  | -2.841688 | 0.224890  | 0.424625  |
| C  | -3.304006 | -2.022877 | -1.218019 |
| H  | -1.173465 | -2.210375 | -1.293884 |
| C  | -4.180833 | -0.150235 | 0.115691  |
| H  | -2.660908 | 1.088600  | 1.057950  |
| C  | -4.413777 | -1.292092 | -0.716767 |
| H  | -3.484240 | -2.887500 | -1.851870 |
| N  | -5.202440 | 0.597951  | 0.630600  |
| C  | -5.757650 | -1.637370 | -1.000521 |
| C  | -6.439810 | 0.235585  | 0.337254  |
| H  | -5.966044 | -2.499550 | -1.628503 |
| C  | -6.774381 | -0.874521 | -0.473508 |
| H  | -7.236554 | 0.846664  | 0.759103  |
| H  | -7.816572 | -1.106617 | -0.666175 |
| Br | -0.238553 | -1.715821 | 2.199155  |

| $E_{\text{elec}}$ (a.u.) | $G_{\text{corr}}$ (a.u.) | $E_{\text{g}}$ (a.u.) | $E_{\text{sol}}$ (a.u.) | $\Delta G^*_{\text{solv}}$ (a.u.) |
|--------------------------|--------------------------|-----------------------|-------------------------|-----------------------------------|
| -5538.946291             | 0.318587                 | -1249.369253          | -1249.492435            | -0.123182                         |

Cartesian coordinates of **22**

|   |          |           |           |
|---|----------|-----------|-----------|
| C | 1.801769 | -0.020331 | -0.222030 |
| C | 2.129645 | -0.828458 | -1.333146 |
| C | 3.441467 | -1.213909 | -1.511386 |

|    |           |           |           |
|----|-----------|-----------|-----------|
| C  | 4.449389  | -0.801227 | -0.601384 |
| C  | 4.094741  | 0.023395  | 0.513845  |
| C  | 2.734288  | 0.406117  | 0.686002  |
| H  | 1.364541  | -1.146457 | -2.034102 |
| H  | 3.718077  | -1.838232 | -2.357051 |
| H  | 2.479633  | 1.029599  | 1.537180  |
| Br | 0.304968  | 2.348690  | -1.190030 |
| Cu | -0.052823 | 0.345482  | 0.077287  |
| N  | -1.959623 | 0.753928  | 0.387032  |
| C  | -2.964973 | 0.120640  | -0.163569 |
| C  | -2.213692 | 1.758310  | 1.421789  |
| C  | -2.676502 | -0.924620 | -1.213612 |
| N  | -4.257443 | 0.330334  | 0.177928  |
| H  | -2.358728 | 2.739128  | 0.950717  |
| H  | -1.322662 | 1.833013  | 2.052497  |
| C  | -3.433396 | 1.378023  | 2.251499  |
| C  | -3.008545 | -2.359190 | -0.750870 |
| H  | -3.234515 | -0.689899 | -2.127580 |
| H  | -1.619694 | -0.857195 | -1.476238 |
| C  | -5.369788 | -0.367342 | -0.482926 |
| C  | -4.621433 | 1.177621  | 1.324578  |
| H  | -3.225771 | 0.450517  | 2.797116  |
| H  | -3.664074 | 2.157118  | 2.983325  |
| C  | -4.485535 | -2.740479 | -0.897166 |
| H  | -2.680471 | -2.483125 | 0.287590  |
| H  | -2.408229 | -3.051365 | -1.351778 |
| C  | -5.466050 | -1.854198 | -0.121965 |
| H  | -6.277843 | 0.152840  | -0.172035 |
| H  | -5.295065 | -0.240637 | -1.567932 |
| H  | -4.994283 | 2.141823  | 0.956138  |
| H  | -5.442696 | 0.686686  | 1.854649  |
| H  | -4.750560 | -2.701113 | -1.962809 |
| H  | -4.617202 | -3.782650 | -0.582411 |
| H  | -5.313357 | -1.962248 | 0.959637  |
| H  | -6.488252 | -2.190378 | -0.332902 |
| C  | 5.811191  | -1.167886 | -0.740371 |
| H  | 6.112248  | -1.794305 | -1.575631 |
| C  | 6.725388  | -0.721896 | 0.185271  |
| H  | 7.776862  | -0.979306 | 0.113957  |
| C  | 6.272558  | 0.091877  | 1.251028  |
| H  | 6.988668  | 0.451532  | 1.988376  |
| N  | 5.014692  | 0.459221  | 1.425018  |
| N  | -0.192066 | -1.291538 | 1.095052  |
| N  | 0.755822  | -2.029559 | 1.274413  |

N 1.608369 -2.777696 1.482772

| $E_{\text{elec}}$ (a.u.) | $G_{\text{corr}}$ (a.u.) | $E_g$ (a.u.) | $E_{\text{sol}}$ (a.u.) | $\Delta G^*_{\text{solv}}$ (a.u.) |
|--------------------------|--------------------------|--------------|-------------------------|-----------------------------------|
| -5241.311410             | 0.324601                 | -1237.913559 | -1237.954556            | -0.040997                         |

Cartesian coordinates of **22-TS**

|    |           |           |           |
|----|-----------|-----------|-----------|
| C  | -1.830705 | 0.563388  | 0.314447  |
| C  | -2.171411 | 1.455719  | -0.727428 |
| C  | -3.498041 | 1.575961  | -1.071707 |
| C  | -4.503199 | 0.852727  | -0.373989 |
| C  | -4.129222 | -0.003551 | 0.713075  |
| C  | -2.759719 | -0.111078 | 1.069996  |
| H  | -1.405456 | 2.001157  | -1.269444 |
| H  | -3.790198 | 2.226287  | -1.891723 |
| H  | -2.479336 | -0.736020 | 1.910968  |
| Cu | -0.048205 | -0.286985 | 0.179003  |
| N  | 1.865110  | -0.813714 | 0.491984  |
| C  | 2.903709  | -0.268274 | -0.088616 |
| C  | 2.069687  | -1.972907 | 1.362854  |
| C  | 2.673934  | 0.929149  | -0.979191 |
| N  | 4.178780  | -0.690557 | 0.090224  |
| H  | 2.048569  | -2.891096 | 0.759911  |
| H  | 1.229167  | -2.027668 | 2.061414  |
| C  | 3.392368  | -1.862873 | 2.111289  |
| C  | 3.298040  | 2.232436  | -0.438328 |
| H  | 3.054364  | 0.722315  | -1.986676 |
| H  | 1.593419  | 1.056317  | -1.076899 |
| C  | 5.313962  | -0.108358 | -0.637817 |
| C  | 4.519386  | -1.701612 | 1.103373  |
| H  | 3.360187  | -0.992503 | 2.776997  |
| H  | 3.571457  | -2.749798 | 2.725629  |
| C  | 4.790478  | 2.397084  | -0.743962 |
| H  | 3.120833  | 2.292457  | 0.642898  |
| H  | 2.756385  | 3.071751  | -0.887019 |
| C  | 5.694674  | 1.301101  | -0.172404 |
| H  | 6.151702  | -0.791786 | -0.484513 |
| H  | 5.103761  | -0.110377 | -1.712739 |
| H  | 4.733638  | -2.655319 | 0.604044  |
| H  | 5.437627  | -1.378330 | 1.603535  |

|    |           |           |           |
|----|-----------|-----------|-----------|
| H  | 4.920332  | 2.420436  | -1.834935 |
| H  | 5.124832  | 3.372347  | -0.370351 |
| H  | 5.684519  | 1.323686  | 0.925003  |
| H  | 6.727782  | 1.495941  | -0.484304 |
| C  | -6.790706 | 0.221682  | 0.038568  |
| H  | -7.853093 | 0.263981  | -0.176430 |
| C  | -6.319589 | -0.594094 | 1.094515  |
| H  | -7.033412 | -1.170721 | 1.680799  |
| N  | -0.334987 | 1.168658  | 1.467148  |
| N  | -0.020485 | 2.288739  | 1.086974  |
| N  | 0.244671  | 3.370176  | 0.799920  |
| Br | -0.608982 | -1.868154 | -1.601993 |
| N  | -5.047712 | -0.714921 | 1.433910  |
| C  | -5.878556 | 0.946578  | -0.693970 |
| H  | -6.192972 | 1.587754  | -1.512851 |

| $E_{\text{elec}}$ (a.u.) | $G_{\text{corr}}$ (a.u.) | $E_{\text{g}}$ (a.u.) | $E_{\text{sol}}$ (a.u.) | $\Delta G^*_{\text{solv}}$ (a.u.) |
|--------------------------|--------------------------|-----------------------|-------------------------|-----------------------------------|
| -5241.296050             | 0.323588                 | -1237.911657          | -1237.955211            | -0.043554                         |

Cartesian coordinates of **Product**

|   |           |           |           |
|---|-----------|-----------|-----------|
| C | 0.314402  | -0.5503   | -0.00138  |
| C | 0.963991  | -1.7754   | -0.294184 |
| C | 2.335354  | -1.807277 | -0.369629 |
| C | 3.103427  | -0.630996 | -0.168323 |
| C | 2.433589  | 0.598494  | 0.122038  |
| C | 1.019803  | 0.613211  | 0.211089  |
| H | 0.371425  | -2.666352 | -0.461519 |
| H | 2.847714  | -2.737628 | -0.595577 |
| H | 0.524592  | 1.545219  | 0.459176  |
| C | 4.518759  | -0.609344 | -0.241989 |
| H | 5.056105  | -1.527288 | -0.462865 |
| C | 5.181021  | 0.576493  | -0.031134 |
| H | 6.26307   | 0.637829  | -0.0778   |
| C | 4.424446  | 1.739847  | 0.253442  |
| H | 4.942082  | 2.682671  | 0.422646  |
| N | 3.106289  | 1.770395  | 0.331499  |
| N | -1.106918 | -0.538398 | 0.069865  |
| C | -1.965957 | 0.470665  | -0.194496 |
| N | -1.791704 | -1.656975 | 0.463209  |
| C | -3.218272 | -0.064592 | 0.050524  |

|   |           |           |           |
|---|-----------|-----------|-----------|
| N | -3.054583 | -1.368142 | 0.448627  |
| C | -4.54848  | 0.561281  | -0.071414 |
| O | -5.564773 | -0.077282 | 0.186133  |
| C | -4.587711 | 1.998784  | -0.519698 |
| H | -4.029889 | 2.628837  | 0.182306  |
| H | -4.110314 | 2.103151  | -1.500427 |
| H | -5.622687 | 2.339332  | -0.57611  |
| H | -1.641723 | 1.439134  | -0.540365 |

| $E_{\text{elec}}$ (a.u.) | $G_{\text{corr}}$ (a.u.) | $E_{\text{g}}$ (a.u.) | $E_{\text{sol}}$ (a.u.) | $\Delta G^*_{\text{solv}}$ (a.u.) |
|--------------------------|--------------------------|-----------------------|-------------------------|-----------------------------------|
| -795.275805              | 0.166018                 | -795.270340           | -795.299103             | -0.028763                         |

Cartesian coordinates of (DBU)CuBr

|    |           |           |           |
|----|-----------|-----------|-----------|
| Cu | 1.577112  | 0.240876  | -0.060592 |
| N  | -0.215554 | 0.885875  | -0.130748 |
| C  | -1.277229 | 0.141576  | -0.365619 |
| C  | -0.405972 | 2.333182  | 0.053561  |
| C  | -1.087147 | -1.344616 | -0.546194 |
| N  | -2.536229 | 0.628105  | -0.415644 |
| H  | -0.405145 | 2.827974  | -0.927527 |
| H  | 0.447618  | 2.720573  | 0.61376   |
| C  | -1.71302  | 2.618084  | 0.780594  |
| C  | -1.729229 | -2.186287 | 0.576648  |
| H  | -1.482374 | -1.656171 | -1.520502 |
| H  | -0.010227 | -1.52792  | -0.570287 |
| C  | -3.692782 | -0.210873 | -0.764592 |
| C  | -2.857241 | 2.006146  | -0.008931 |
| H  | -1.673058 | 2.179677  | 1.784418  |
| H  | -1.873031 | 3.694355  | 0.888752  |
| C  | -3.228598 | -2.446589 | 0.397348  |
| H  | -1.539717 | -1.69914  | 1.541938  |
| H  | -1.209985 | -3.150456 | 0.606899  |
| C  | -4.101955 | -1.189727 | 0.340609  |
| H  | -4.511032 | 0.480605  | -0.975393 |
| H  | -3.489959 | -0.747536 | -1.696911 |
| H  | -3.07755  | 2.601415  | -0.903885 |
| H  | -3.76817  | 1.969784  | 0.596292  |
| H  | -3.372648 | -3.012317 | -0.533564 |
| H  | -3.578396 | -3.092712 | 1.211281  |
| H  | -4.083262 | -0.661099 | 1.302314  |

|    |           |           |          |
|----|-----------|-----------|----------|
| H  | -5.141971 | -1.488168 | 0.162883 |
| Br | 3.795834  | -0.4385   | 0.034883 |

| $E_{\text{elec}}$ (a.u.) | $G_{\text{corr}}$ (a.u.) | $E_{\text{g}}$ (a.u.) | $E_{\text{sol}}$ (a.u.) | $\Delta G^*_{\text{solv}}$ (a.u.) |
|--------------------------|--------------------------|-----------------------|-------------------------|-----------------------------------|
| -4676.050010             | 0.202939                 | -672.711129           | -672.7472571            | -0.036128                         |

Cartesian coordinates of **DBUH<sup>+</sup>**

|   |           |           |           |
|---|-----------|-----------|-----------|
| N | -1.463167 | 1.339337  | -0.138634 |
| C | -0.327982 | 0.691035  | -0.373529 |
| C | -2.747143 | 0.68312   | 0.112677  |
| C | 0.918063  | 1.50952   | -0.557274 |
| N | -0.287537 | -0.633708 | -0.409612 |
| H | -3.293073 | 0.576077  | -0.831253 |
| H | -3.328062 | 1.32907   | 0.773155  |
| C | -2.477445 | -0.6747   | 0.744989  |
| C | 1.95931   | 1.282734  | 0.559749  |
| H | 1.356514  | 1.276941  | -1.534126 |
| H | 0.622107  | 2.560577  | -0.584745 |
| C | 0.952963  | -1.366293 | -0.735019 |
| C | -1.479747 | -1.451048 | -0.102472 |
| H | -2.075764 | -0.535399 | 1.753913  |
| H | -3.405765 | -1.244926 | 0.823187  |
| C | 2.801224  | 0.014669  | 0.387727  |
| H | 1.448923  | 1.276865  | 1.530477  |
| H | 2.626708  | 2.150526  | 0.561341  |
| C | 2.008819  | -1.296299 | 0.370851  |
| H | 0.649682  | -2.399739 | -0.905836 |
| H | 1.352889  | -0.990324 | -1.681704 |
| H | -1.929314 | -1.777708 | -1.046779 |
| H | -1.13349  | -2.338141 | 0.432018  |
| H | 3.363067  | 0.094696  | -0.55264  |
| H | 3.543973  | -0.027074 | 1.192602  |
| H | 1.519328  | -1.46782  | 1.337622  |
| H | 2.705449  | -2.127923 | 0.215904  |
| H | -1.416614 | 2.348475  | -0.091609 |

| $E_{\text{elec}}$ (a.u.) | $G_{\text{corr}}$ (a.u.) | $E_{\text{g}}$ (a.u.) | $E_{\text{sol}}$ (a.u.) | $\Delta G^*_{\text{solv}}$ (a.u.) |
|--------------------------|--------------------------|-----------------------|-------------------------|-----------------------------------|
| -462.262745              | 0.223324                 | -462.289738           | -462.3785298            | -0.088792                         |

## Section 6

### References

- [1] Rohrbach, S.; Murphy, J. A.; Tuttle, T. Computational Study on the Boundary Between the Concerted and Stepwise Mechanism of Bimolecular S<sub>N</sub>Ar Reactions. *J. Am. Chem. Soc.* **2020**, *142*, 14871-14876.
